# Supplementary material for: Revisiting the trend in the occurrences of the warm Arctic-cold Eurasian continent temperature pattern
Source: Copernicus journal article supplement (doi:10.5194/acp-2020-413), 2020-07-28
Supplement: Supplementary file [file acp-2020-413-AC4-supplement.pdf]

1 The linkage between the warm Arctic and mid-latitude weather and climate is a hot topic for  
2 cryosphere research community and for this reason, I see this study is interesting and worth to  
3 be noticed as a scientific publication. The manuscript is well structured, and the objectives of  
4 this study are clear. The content fits well the scope of ACP.

5 I recommend this manuscript to be published in ACP. However, I see there are some aspects  
6 scientifically and technically that still need further improvement for better clarity of this  
7 manuscript, I hope authors can make corresponding revisions based on my comments below:

8  
9 1 Title: “Revisiting the trend in the occurrences of the “warm Arctic-cold Eurasian continent”  
10 temperature pattern” Why “revisit”? Have you (authors) done this before? Or are there other  
11 papers dealing with this matter before? if so, what are the scientific outcome from those  
12 existing studies?

13 We have not carried out previous research on the potential mechanisms for the trends of  
14 warm-Arctic-cold Eurasian per se, but there have been several other studies that are either  
15 directly or indirectly related to this specific topic. Two main conclusions regarding the  
16 forcing behind the trends stem from these studies. One conclusion is that the recent warm  
17 Arctic-cold continents pattern can be attributable to the Arctic sea ice loss (Inoue et al., 2012;  
18 Tang et al., 2013; Mori et al., 2014; Kug et al., 2015; Cohen et al., 2018; Mori et al., 2019);  
19 The others disputed sea ice loss as a driver for the trend (Blackport et al., 2019; Fyfe, 2019),  
20 Instead, they point to internal atmospheric variability and the Pacific and Atlantic SST  
21 oscillations as potential forcing behind the trends (Lee et al., 2011; Sato et al., 2014;  
22 Matsumura and Kosaka, 2019; Clark and Lee, 2019). Most of these previous studies and the  
23 two school of thought were mentioned in the Introduction. Our work, which took a different  
24 approach, confirmed the second school of thought. Because of these existing studies on this  
25 topic, we used the word ‘revisiting’ in the title of our manuscript.

26  
27 2 To my understanding, SOM is a pure advanced statistical tool and there is nothing related to  
28 the physics, right? If this is the case, shall I say any results come from SOM have  
29 uncertainties because you need to pre-define SOM nodes and this procedure is a kind  
30 arbitrary, right? On top of it, as you pointed out in the abstract only 40% of the surface  
31 temperature trends are explained by SOM pre-defined nodes that fit to your pre-condition, i.e.  
32 warm Arctic-cold Eurasian continent. What I am trying to say is that for what kind of criteria  
33 you need to be satisfied before you can make a rebuts conclusion to say: “ok, there is a  
34 linkage” or “no, there isn’t a linkage”. This comment and “a kind of arbitrary” above come  
35 from your description on line 141-143.

36 SOM is an advanced statistical tool for pattern extraction. Although SOM is superior to some  
37 other existing pattern extraction tools such as EOF, it suffers from the same limitations as  
38 other statistical tools in identifying physical modes. That was why a large part of the  
39 manuscript was devoted to explain the existence of the patterns and their trends based on  
40 physical understanding of atmosphere and ocean dynamics that had been established from  
41 theoretical framework and/or from coupled ocean-atmosphere modeling. Yes, to use the SOM  
42 method, one has to pre-define SOM nodes and the procedure is not completely objective. A  
43 small grid (each node has larger frequency of occurrence) tends to miss transitions between  
44 the main patterns that are retained by a large grid. But an excessively large grid could

45 sidetrack the attention from the main variability patterns. Nevertheless, changing the grid  
46 from 3x3 to 4x4 or even larger would not change the main conclusion.

47

48 3 How sensitivity of the data source will impact the final result? In this study, you have  
49 applied ERA-Interim data. if you use other data resource, e.g. NCEP or MERRA, would be  
50 your conclusion changed entirely or partly? I am not asking to use these data sets to rerun  
51 SOM, but it would be nice to comment it at the end of this study.

52 We believe our results are not particularly sensitive to the specific large-scale reanalysis data  
53 source. We could have also used ERA5, or NCEP or MERRA and arrived at similar  
54 conclusions, although there might be some minor differences. We have added some  
55 comments on this point at the end of the study.

56

57 4 Authors focused on the impacts of the SST anomalies over North Pacific and Atlantic  
58 Oceans on the trend in the occurrences of the “warm Arctic cold Eurasian continent”  
59 temperature pattern. The influence of decreasing Arctic sea ice cannot be ignored.

60 You may consider to add discussions on the influence of sea ice to your pre-defined warm  
61 Arctic and cold Eurasian content.

62 We added some discussions on the influence of sea ice in the Conclusions and Discussions  
63 section.

64

65 There are a number of technical details need to be clarified:

66 a) Fig.1: All “percent” sum together is larger than 100%, please check.

67 Changed

68

69 b) Fig.2: The color bar refers to what? Contour color? what are the background (fingerprint  
70 like) information in each sub-plot? The text explanation for figure 2 (line 182 -185) and figure  
71 2 presentation seems not match to each other. I suggest you remove unnecessary from the plot  
72 and only show what you have explained in the text so readers can understand better.

73 Both color bar and contour color refer to 500-hPa geopotential height anomalies. Dotted  
74 regions in each sub-plot indicate the above 95% confidence level.

75 We revised some of the discussion.

76

77 c) The comment above applied to at least Fig, 3, 4, 5 and 6.

78 In Figure 3-6, shaded and dotted regions indicate the above 95% confidence level.

79

80 d) “same as Figure2, but for,,,” This is not a good figure caption, please write clear with full  
81 information. For those surface fluxes, I think you need to explain the unit of the fluxes, are  
82 those daily accumulated fluxes?

83 We revised figure caption with details. The fluxes are daily accumulated fluxes, which are  
84 now explained in the caption and text.

85

86 e) The sea ice concentration figure needs more explanations, e.g. node information was  
87 missing; what was meant for positive and negative anomalous? is this also for winter season?  
88 how about summer season? Now I realized you actually only investigate winter season for

89 everything, if so, you need to say this explicitly in the beginning of the paper.  
90 We added node information. The anomalous sea ice concentration is a composite result based  
91 on the occurrences of nodes. For example, the negative sea ice concentration corresponds to  
92 the spatial pattern of air temperature for node 1. In this paper, we only examine warm  
93 Arctic-cold continents pattern in boreal winter, which was mentioned in the first and second  
94 paragraph of the manuscript.  
95  
96 f) Fig.7 and 14: I have difficult to understand these figures? What we can learn from those  
97 figures? If you only tell the integrated total number of days for each node and compared with  
98 showing this figure, what we will missing up?  
99 Figure 7 and 14 show the integrated total number of days for each node. In Figure 7 and 14,  
100 the numbers for nodes 1 and 4 are larger after 2000 than those prior to 2000. The opposite  
101 occurs for nodes 6 and 9. Figure 14 mainly show an interdecadal variability of the number.  
102 The trends in the number for nodes 1, 4, 6, and 9 are a fragment of the interdecadal variability.  
103 We added clarification in the discussion.  
104  
105 g) Fig. 12: “wave activity flux”: This need to be explained more in detail both here and in the  
106 text. 100m<sup>2</sup>/s, what is this? and in the caption:107 m<sup>2</sup>/s.  
107 “vector 100m<sup>2</sup>/s” in the figure is figure legend of wave activity flux. The unit of stream  
108 function is m<sup>2</sup>/s and its magnitude is the product of the values in the figure and 10<sup>7</sup>. We have  
109 added explanation of wave activity flux in the discussion and in the figure caption with a  
110 reference.  
111  
112 h) Please mark the study area in corresponding figures 2-6, to help readers understand the  
113 mechanism impact more intuitively.  
114 Marked  
115  
116 i) Table 3 is not mentioned in the article, and some problems of uppercase and lowercase  
117 letters (such as not show or Not show), please check them carefully.  
118 Changed  
119  
120 j) The order of the nodes should be consistent in figures, 10-12.  
121 Changed  
122  
123 k) Authors should increase some discussions about the application of statistical results in  
124 prediction of surface temperature Arctic cold Eurasian continent.  
125 Added discussion  
126  
127 The results in this study are based on statistical analysis. Some numerical experiments may be  
128 considered in the further studies.  
129 Added  
130  
131

132 **Revisiting the trend in the occurrences of the “warm Arctic-cold Eurasian continent”**

133 **temperature pattern**

134 Lejiang Yu<sup>1,2\*</sup>, Shiyuan Zhong<sup>3</sup>, Cuijuan Sui<sup>4</sup>, and Bo Sun<sup>1</sup>

135 1MNR Key Laboratory for Polar Science, Polar Research Institute of China, Shanghai, China

136 2 Southern Marine Science and Engineering Guangdong Laboratory (Zhuhai), Zhuhai, Guangdong,

137 China

138 3Department of Geography, Environment and Spatial Sciences, Michigan State University, East

139 Lansing, MI, USA

140 4 National Marine Environmental Forecasting Center, Beijing, China

141

142 \*Corresponding Author’s address

143 Dr. Lejiang Yu

144 MNR Key Laboratory for Polar Science, Polar Research Institute of China

145 451 Jinqiao Rd. Shanghai, 200136

146 Phone: 86-21-58712034,

147 Email: yulejiang@sina.com.cn

148

149

150

151

152

153

154 **Abstract.** The recent increasing trend of “warm Arctic, cold continents” has attracted much attention,  
155 but it remains debatable as to what forces are behind this phenomenon. Here, we revisited  
156 surface-temperature variability over the Arctic and Eurasian continent by applying the  
157 Self-Organizing-Map (SOM) technique to gridded daily surface temperature data. Nearly 40% of the  
158 surface temperature trends are explained by the nine SOM patterns that depict the switch to the current  
159 warm Arctic-cold Eurasia pattern at the beginning of this century from the reversed pattern that  
160 dominated the 1980s and the 90s. Further, no cause-effect relationship is found between the Arctic  
161 sea-ice loss and the cold spells in high-mid latitude Eurasian continent suggested by earlier studies.  
162 Instead, the increasing trend in warm Arctic-cold Eurasia pattern appears to be related to the anomalous  
163 atmospheric circulations associated with two Rossby wavetrains triggered by rising sea surface  
164 temperature (SST) over the central North Pacific and the North Atlantic Oceans. On interdecadal  
165 timescale, the recent increase in the occurrences of the warm Arctic-cold Eurasia pattern is a fragment  
166 of the interdecadal variability of SST over the Atlantic Ocean as represented by the Atlantic  
167 Multidecadal Oscillations (AMO), and over the central Pacific Ocean.

168

169 **Key words:** Warm Arctic-cold Eurasian continent, Arctic Sea ice, the Kara-Barents Sea, the  
170 Self-Organizing-Map (SOM), the Pacific Decadal Oscillation (PDO), the Atlantic Multidecadal  
171 Oscillation (AMO)

172

173

174

175

176 **1 Introduction**

177 In recent decades, winter season temperature in the Arctic has been rising at a rate faster than the  
178 warming experienced in any other regions of the world (Stroeve et al., 2007; Screen and Simmonds,  
179 2010; Stroeve, 2012). In contrasts, there has been an increasing trend in colder than normal winters  
180 over the northern mid-latitude continents (Mori et al., 2014; [Cohen et al., 2014; 2018](#)). This pattern of  
181 opposite winter temperature trend between the Arctic and high-mid latitude continents, referred to as  
182 the warm Arctic-cold continents pattern (Overland et al., 2011; Cohen et al., 2014; Walsh, 2014), has  
183 ~~also been observed on the interannual timescale~~[received considerable interest in the scientific](#)  
184 [community especially with regard to dynamical and physical mechanisms for the development of the](#)  
185 [phenomenon](#) (Mori et al., 2014; ~~Kug et al., 2015~~)~~The question as to what processes are responsible for~~  
186 ~~the opposite change of winter air temperature between the Arctic and mid latitudes remain open~~  
187 (~~Vihma, 2014; Barnes and Screen, 2015; Kug et al., 2015; Overland et al., 2015; Chen et al., 2018~~).

188 [Using observational analyses or coupled ocean-atmosphere modeling](#), ~~A~~ number of studies have  
189 attributed the recent warm Arctic-cold continents pattern to the Arctic sea ice loss [in boreal winter](#)  
190 (Inoue et al., 2012; Tang et al., 2013; Mori et al., 2014; Kug et al., 2015; Cohen et al., 2018; Mori et al.,  
191 2019). Sea ice variability in different parts of the Arctic Ocean has been linked to climate variability in  
192 different parts of the world. Specifically, sea ice loss in the Barents and Kara Seas has been linked to  
193 cold winters over East Asia (~~add a reference~~ [Kim et al., 2014; Mori et al., 2014; Kug et al., 2015;](#)  
194 [Overland et al., 2015](#)) [and in central Eurasia \(Mori et al., 2014\)](#), while a similar connection has been  
195 found between cold winters in North America and sea ice retreat in the East Siberian and Chukchi Seas  
196 (Kug et al., 2015). A most recent study (Matsumura and Kosaka, 2019) attributed the warm Arctic-cold  
197 continents pattern to the combined effect of Arctic sea ice loss and the atmospheric teleconnection

198 induced by tropical Atlantic sea-surface temperature (SST) anomalies. ~~Some recent studies have~~  
199 ~~suggested that the mid-latitude atmospheric circulation anomalies play a role in the formation of the~~  
200 ~~warm Arctic-cold continents pattern (Luo et al., 2016; Peings et al., 2019).~~

201 Other studies, however, found no cause-and-effect relationship between Arctic sea ice loss and  
202 mid-latitude climate anomalies (Blackport et al., 2019; Fyfe, 2019). Numerical modeling studies using  
203 coupled ocean and atmospheric models simulated no cold mid-latitude winters when the models were  
204 forced with reduced Arctic sea ice cover (McCusker et al., 2016; Sun et al., 2016; Koenig et al., 2019;  
205 Blackport et al., 2019; Fyfe, 2019). ~~Instead, The results from~~ these studies pointed to internal  
206 atmospheric variability as the likely cause for cold winters in mid-latitudes. Some studies have also  
207 suggested that on the interannual timescale mid-latitude atmospheric circulation anomalies triggered by  
208 the Pacific and Atlantic SST oscillations may explain both the Arctic sea ice loss and the cooling of the  
209 high-mid latitudes (Lee et al., 2011; [Luo et al., 2016](#); [Peings et al., 2019](#); Matsumura and Kosaka, 2019;  
210 Clark and Lee, 2019). The [sea surface temperature anomalies over the](#) Gulf Stream ~~have~~ ~~has~~ also been  
211 linked to the Barents Sea ice loss and Eurasian cooling (Sato et al., 2014).

212 Despite the recent attention given to the warm Arctic-cold continents pattern, it remains debatable  
213 as to ~~what the roles of various dynamical and physical processes play may be responsible in the~~  
214 ~~formation of~~ ~~-for~~ this phenomenon. In this study, we revisit surface temperature variability over the  
215 Arctic and Eurasia continent (40-90°N, 20-130°E), where the warm Arctic-cold continents pattern is a  
216 prominent feature (Cohen et al., 2014; Mori et al., 2014), by applying the Self-Organizing-Map (SOM)  
217 technique to daily surface temperature over the recent four decades. We will show that while the warm  
218 Arctic-cold Eurasian continent pattern has dominated the recent two decades, its opposite pattern, cold  
219 Arctic-warm Eurasia continent, appeared frequently in the 1980s and the 90s. Using century-long data,

220 we will further show that the warm Arctic-cold Eurasian continent pattern is an intrinsic climate mode  
221 and the recent increasing trend in its occurrence is a reflection of an interdecadal variability of the  
222 pattern. Using [linear regression](#)~~-method~~, we explain the reason for the recent increasing occurrences of  
223 the warm Arctic-cold continents pattern. We also assess the role of the SST anomalies over the North  
224 Pacific and Atlantic Oceans in the variability of the warm Arctic-cold Eurasia pattern on the  
225 interdecadal time scale.

## 226 2 Datasets and methods

~~227 From the perspective of nonlinear dynamic, a region's climate has its intrinsic modes of variability, but  
228 the frequency of occurrence of these internal modes can be modulated by remote forces external to the  
229 region (Palmer, 1999; Hoskins and Woollings, 2015; Shepherd, 2016). In this study we will first obtain  
230 the main modes of variability of wintertime surface temperature in a region (40-90 N, 20-130 E) by  
231 applying the SOM method (Kohonen, 2001) to daily surface temperature data for the 40 winters in the  
232 1979-2019 period. The use of daily data over four decades allows for capturing the variability across  
233 two time scales (synoptic and decadal). We will then determine, through regression and composite  
234 analyses, the relationships of these modes of climate variability of surface air temperature to known  
235 climate variability modes at corresponding time scales.—~~

### 236 2.1 Datasets

237 Daily surface air temperature and other climate variables used in the current analyses, including  
238 500 hPa geopotential height, 800-hPa wind and mean sea level pressure, all come from the [European  
239 Centre for Medium-Range Weather Forecasts ~~Re-Analysis~~ \(ERA\)](#), the interim version (ERA-Interim;  
240 Dee et al., 2011) [with a horizontal resolution of approximately 79 km \(T255\) and 60 vertical levels in  
241 the atmosphere](#). Compared to the earlier versions of ERA (e.g., ERA-40, Uppala et al., 2005) and other



242 global re-analysis products (e.g. the NCEP reanalysis, Kalnay et al., 1996), ERA-Interim has been  
243 found to be more accurate in portraying the Arctic warming trend (Dee et al., 2011; Screen and  
244 Simmonds, 2011) despite its known warm and moist bias in the surface layer (Jakobson et al., 2012).

245 Daily sea ice data are obtained from the U.S. National Snow and Ice data Center  
246 ([ftp://sidacs.colorado.edu/DATASETS/nsidc0051\\_gsfc\\_nasateam\\_seaice/final-gsfc/north/daily](ftp://sidacs.colorado.edu/DATASETS/nsidc0051_gsfc_nasateam_seaice/final-gsfc/north/daily)).

247 Gridded monthly SST data used in the current analysis are obtained from the U.S. National Oceanic  
248 and Atmospheric Administration (NOAA) data archives  
249 (<ftp://ftp.cdc.noaa.gov/Datasets/noaa.oisst.v2.highres/>) (Reynolds et al. 2007).

250 The results obtained from the data within the recent four decades are put into the context of the  
251 variability over longer time scales using data from the Twentieth Century Reanalysis project, version  
252 2Ce (20CR) that spans more than a century from 1851 through 2015 (Compo et al., 2011). The 20CR  
253 reanalysis data, which has a horizontal resolution of 2 °latitude by 2 °longitude and temporal resolution  
254 of 6 hours. ~~Through the assimilation of surface observational pressure data, the 20CR reanalysis~~ was  
255 produced by ~~the~~ model ~~whose driven at the~~ lower boundary ~~by condition is derived from observed~~  
256 monthly SST and sea ice conditions and with data assimilation of surface pressure observations.  
257 ~~Various~~ Several indices used to describe known modes of climate variability ~~are obtained from~~  
258 ~~NOAA's Climate prediction Center (CPC) (<https://www.esrl.noaa.gov/psd/data/climateindices/list/>),~~  
259 ~~which~~ include Arctic oscillation (AO), Northern Atlantic Oscillation (NAO), Atlantic Multidecadal  
260 Oscillation (AMO) (Enfield et al., 2001) and PDO (Mantua et al., 1997) ~~indices.~~ are obtained from  
261 NOAA's Climate prediction Center (CPC) (<https://www.esrl.noaa.gov/psd/data/climateindices/list/>).

## 262 2.2 Methods

263 From the perspective of nonlinear dynamic, a region's climate has its intrinsic modes of variability.

264 but the frequency of occurrence of these internal modes can be modulated by remote forces external to  
265 the region (Palmer, 1999; Hoskins and Woollings, 2015; Shepherd, 2016). In this study we will first  
266 obtain the main modes of variability of wintertime surface temperature in a region (40-90°N, 20-130°E)  
267 by applying the SOM method (Kohonen, 2001) to daily surface temperature data for the 40 winters  
268 (December, January, -February) in the 1979-2019 period from December 1979 through February 2019.  
269 The use of daily data over four decades allows for capturing the variability across two time scales  
270 (synoptic and decadal). ~~The 40-year, daily surface temperature over the study region (40-90°N,~~  
271 ~~20-130°E) is decomposed using the SOM method.~~ SOM is a clustering method based on neural  
272 network that can transform multi-dimensional data into a two-dimensional array without supervised  
273 learning. The array includes a series of nodes arranged by a Sammon map (Sammon, 1969). Each node  
274 in the array has a vector that can represent a spatial pattern of the input data. The distance of any two  
275 nodes in the Sammon map represents the level of similarity between the spatial patterns of the two  
276 nodes. Because SOM has fewer limitations than most other commonly used clustering methods, (e.g.,  
277 orthogonality required by the empirical orthogonal function or EOF method), the SOM method can  
278 describe better the main variability patterns of the input data (Reusch et al., 2005).

279 SOM method has been used in atmospheric research at mid and high latitudes of the northern  
280 hemisphere (Skific et al., 2009; Johnson and Feldstein, 2010; Horton et al., 2015; Loikith and Broccoli,  
281 2015; Vihma et al., 2019). For example, Johnson and Feldstein (2010) used SOM to identify~~ied the~~  
282 spatial patterns of ~~the~~ daily wintertime North Pacific sea level pressure and related ~~ed~~ the variability of the  
283 occurrences of those patterns to some large-scale circulation indices. Loikith and Broccoli (2015)  
284 compared observed and model-simulated circulation patterns across the North American domain using  
285 an approaching involving SOM. The SOM method was also used to detect circulation pattern trends in

286 a subset of North America during two [different](#) periods (Horton et al., 2015).  
287 In this study, the SOM method is applied to [ERA-Interim](#) wintertime daily temperature anomalies [from](#)  
288 [December 1979 through February 2019. The anomalies are calculated](#)~~obtained~~ by subtracting 40-year  
289 averaged daily temperature from the original daily temperature at each grid point. Prior to SOM  
290 analysis, it is necessary to determine how many SOM nodes are needed to best capture the variability  
291 in the data. According to previous studies (Lee and Feldstein, 2013; Gibson et al., 2017; Schudeboom  
292 et al., 2018), the rule for determining the number of SOM nodes is that the number should be  
293 sufficiently large to capture the variability of the data analyzed, but not too large to introduce  
294 unimportant details. Table 1 shows the averaged spatial correlation between all daily surface air  
295 temperature [anomalies](#) and their matching nodes. ~~There is an increase in~~ [The spatial](#) correlation  
296 coefficients [increase](#) from 0.26 for a 3×1 grid to 0.51 for a 4×4 grid, but the gain from a 3×3 grid to a  
297 4×4 grid is relatively small. Hence, a 3×3 grid seems to meet the above-mentioned rule and will be  
298 utilized in this study.

299 The contribution of each SOM node to the trend in wintertime surface temperature [anomalies](#) is  
300 calculated by the product of each node pattern and its frequency trend normalized by the total number  
301 [\(90\)](#) of wintertime days ~~(90,~~ Lee and Feldstein, 2013). The sum of the contributions from all nodes  
302 denotes the SOM-explained trends. Residual trends are equal to the subtraction of SOM-explained  
303 trends from the total trends. [The anomalous atmospheric circulation pattern corresponding to each of](#)  
304 [the SOM pattern is obtained by composite analysis that computes a composite mean of an atmospheric](#)  
305 [circulation field \(e.g., 500 hPa height\) over all occurrences of that SOM node. Regression analysis is](#)  
306 [also performed where atmospheric circulation variables are regressed onto the time series of the](#)  
307 [occurrence of a SOM node to further elucidate the relationship between the variability of atmospheric](#)

308 [circulations and surface temperatures](#). The statistical significance [of composite and regression analyses](#)  
309 in this study is tested by using the Student's t test.

### 310 **3 Results**

#### 311 3.1 Surface temperature variability

312 The majority of the 9 SOM nodes depict a dipole pattern characterized by opposite changes in  
313 [surface temperatures](#) between the Arctic Ocean and the Eurasian continent, although the sign switch  
314 does not always occur at the continent-ocean boundary (Figure 1). The [differences in the](#) position of the  
315 boundary between the warm and cold anomalies [reflects](#) the transition between the cold Arctic-warm  
316 Eurasia pattern (denoted, in descent order of the occurrence frequency, by nodes 3, 9, 6), to the warm  
317 Arctic-cold Eurasia pattern (depicted, in descent order of the occurrence frequency, by nodes 1, 7, 4).

318 The spatial patterns represented by the first group of nodes (~~3, 9, 6~~) are almost mirror images of the  
319 patterns denoted by the corresponding nodes in the second group (~~1, 7, 4~~). For example, the ~~first-second~~  
320 node in group 1 (node 9, 15.4%) and [the first node](#) in group 2 (node 1, 17.1%) show a mirror image  
321 pattern with cold (warm) anomalies in the Arctic Ocean extending into northern Eurasia and warm  
322 (cold) anomalies in the rest of the Eurasia continent in the study domain. In both cases, the region of  
323 maximum ~~anomalies-magnitude anomalies~~ is centered near Svalbard, Norway. The second ~~most~~  
324 ~~frequent-patternpair~~, denoted by node 3 (17.2%) and 7 (13.7%) ~~in the two groups, respectively~~, has the  
325 boundary of separation moved northward from northern Eurasia continent toward the shore of the  
326 Arctic Ocean. While the maximum anomaly in the Arctic Ocean remains close to Svalbard, maximum  
327 values over the continent are found in central Russia. Nodes 4-6 display a noticeable transition from  
328 node 1 to node 7 and from node 3 to node 9, respectively. Although nodes 2 and 8 show an  
329 approximate monopole spatial pattern, they also represent a transition between nodes 1 and 3, and

330 between nodes 7 and 9, respectively. Above SOM analysis ~~cannot~~does not consider the trend in surface  
331 air temperature. The result is similar ~~while when removing~~ the trend is removed (~~Not-not~~ shown).

332 The temporal variability on this time scale is typically related to synoptic processes and hence the  
333 questions are what synoptic patterns are responsible for the occurrence of the spatial patterns depicted  
334 by each of the 9 SOM nodes and how these patterns are related to those of the Arctic sea ice anomalies?

335 These questions can be answered by using the composite method. Specifically, for each SOM node,  
336 composite maps are made respectively for the anomalous 500-hPa geopotential height, mean sea level  
337 pressure, 850-hPa wind, downward longwave radiation, surface turbulent heat flux, and sea ice  
338 concentration over all the days when the spatial variability of the surface temperature anomalies is best  
339 matched by the spatial pattern of that node.

### 340 3.2 Large-scale circulation patterns

341 For all SOM nodes, the spatial pattern of the composited 500 hPa-geopotential height anomalies  
342 (Figure 2) is similar to that of mean sea level pressure anomalies (~~Not-not~~ shown), indicating an  
343 approximately barotropic structure. For nodes 1, 4 and 7, the 500-hPa height anomalies show a dipole  
344 structure of positive values over Siberia and negative values to its south over the Eurasian continent.

345 Anomalous southwesterly winds on the western side of the anticyclone over Siberia transport warm  
346 and moist air from northern Europe and the North Atlantic Ocean into the Atlantic sector of the Arctic  
347 Ocean (Figure 3), providing a plausible explanation of the warm surface temperature anomalies in the  
348 region (Figure 1). On the eastern side of the anticyclone, anomalous northwesterly winds bring cold  
349 and dry air from the Arctic Ocean into Eurasia continent, which is consistent with the negative surface  
350 temperature anomalies there. The opposite occurs for nodes 3, 6 and 9. A similar explanation involving  
351 anomalous pressure and wind fields can be applied to other nodes. The dipole structure that dominates

352 the anomalous 500-hPa height fields over the North Atlantic Ocean for most nodes resembles the  
353 spatial pattern of the NAO (Figure 2). In addition, the patterns for ~~several~~ a few nodes, such as nodes 4  
354 and 7, have some resemblance to the spatial pattern of the AO over larger geographical region. The  
355 possible connection to NAO and AO is further investigated by averaging the daily index values of  
356 NAO or AO over all occurrence days for each node. The results (Table 2) show that nodes 1, 2, 3 (5, 8,  
357 9) correspond to a significant positive (negative) phase of the NAO index characterized by negative  
358 (positive) height anomalies over Iceland and positive (negative) values over the central North Atlantic  
359 Ocean. Association is also found between nodes 1, 2, 3, and 6 (5, 7, 8, and 9) and the positive (negative)  
360 phases of the AO index.

### 361 3.3 Downward radiative fluxes

362 Besides the anomalous circulation patterns, anomalous surface radiative fluxes may also play a role in  
363 shaping the spatial pattern of surface temperature variability. In fact, the spatial pattern of the mean  
364 anomalous daily downward longwave radiation for an individual node (Figure 4) is in good agreement  
365 with the spatial pattern of the surface temperature anomalies of that node. In other words, increased  
366 downward longwave radiation is associated with positive surface temperature anomalies, and vice  
367 versa. As expected from previous studies (e.g., Sedlar et al. 2011), there is a significant positive  
368 correlation between downward longwave radiative fluxes and the anomalous total column water vapor  
369 and mid-level cloud cover (not shown). The correlation to low- and high-level cloud cover is, however,  
370 not significant (~~Not~~ not shown). Most of the water vapor in both the Arctic and Eurasia is derived from  
371 the North Atlantic Ocean, but the water vapor is transported into the Arctic by southwesterly flows and  
372 into Eurasia by northwesterly winds. The anomalous shortwave radiation corresponding to each node  
373 (not shown) is an order of magnitude smaller than that of the longwave radiation anomalies and has a spatial

374 pattern opposite to that of the mid-level cloud cover and the longwave radiation anomalies.

#### 375 3.4 Sea ice

376 The analyses presented above attempt to explain the spatial pattern of surface temperature  
377 variability for each node from the perspective of anomalous heat advection and surface radiative fluxes.

378 As mentioned earlier, there has been a debate in the literature about the role played by the sea ice  
379 anomalies in the Barents and Kara Seas in the development of the warm Arctic-cold Eurasia pattern.

380 Here, we examine the anomalous turbulent heat flux (Figure 5) and sea ice concentration (Figure 6) for  
381 each node. Turbulent heat flux is considered positive when it is directed from the atmosphere  
382 downward to the ocean or land surfaces. Thus, a positive anomaly indicates either an increase in the  
383 atmosphere-to-surface heat transfer or a decrease in the heat transfer from the surface to the atmosphere.

384 The magnitude of anomalous turbulent heat flux is found to be comparable to that of anomalous  
385 downward longwave radiation (Figure 4). For all nodes, the heat flux anomalies are larger over ocean

386 than over land [\(Figure 5\)](#). For node 1, positive turbulent heat flux anomalies occur mainly over the

387 Barents Sea, the western and central North Atlantic Ocean and the eastern North Pacific Ocean,  
388 indicating an increase in heat transport from the air to the ocean due possibly to an increase in vertical

389 temperature gradient caused by warm air advection associated with anomalous circulation [\(Figures 2](#)  
390 [and 3\)](#). The downward heat transfer results in sea ice melt in the Greenland Sea and the Barents Sea

391 (Figure 6). For node 4, the anomalous southerly winds over the Nordic Sea produce larger positive

392 turbulent heat flux anomalies [\(Figure 5\)](#). For node 7, the anticyclone is located more northwards, which

393 generates opposite anomalous winds between the Nordic and northern Barents Seas and the southern

394 Barents Sea and thus opposite turbulent heat flux anomalies that are consistent with the opposite sea ice

395 concentration anomalies in the two regions [\(Figure 5\)](#). For nodes 3, 6, and 9, the anomalous cold air

396 from the central Arctic Ocean flows into warm water in the Nordic and Barents Seas, producing  
397 negative turbulent heat flux anomalies and positive sea ice concentration anomalies ([Figures 5 and 6](#)).  
398 Sorokina et al. (2016) noted that turbulent heat flux usually peaks 2 days before changes in surface  
399 temperature pattern occur. The pattern of the composited anomalous [500-hPa geopotential height](#),  
400 turbulent heat flux [and sea ice concentration](#) 2 days prior to the day when the nodes occur (not shown)  
401 is similar to the current-day pattern in [Figures 2, 65, and 6](#). Our results support the conclusion of  
402 Sorokina et al. (2016) and Blackport et al. (2019) that the anomalous atmospheric circulations lead to  
403 the anomalous sea ice concentration in the Barents Sea.

#### 404 ~~3.5 Contributions of SOM nodes to the~~ Trends in wintertime surface temperature

405 The results above suggest that both the surface temperature anomaly patterns over the Arctic Ocean  
406 and Eurasian continent and the sea ice concentration anomalies in the Nordic and Barents Seas can be  
407 explained largely by changes in atmospheric circulations and the associated vertical and horizontal heat  
408 and moisture transfer by mean and turbulent flows. Next, we assess the [trends of wintertime surface](#)  
409 [temperature and the](#) contributions of these [SOM](#) nodes to the ~~trends in wintertime surface temperature~~.

410 We first examine the time series of the accumulated number of days for each node in each winter  
411 for the 1979-2019 period (Figure 7). The time series for nodes 1, 4, 6, and 9 exhibit variability on  
412 interannual as well as decadal time scales. The occurrence frequency is noticeably larger after 2003  
413 than prior to 2003 for nodes 1 and 4, and vice versa for nodes 6 and 9, and the difference between the  
414 two periods is significant at 95% confidence level. Given the spatial patterns of these four nodes  
415 (Figure 1), this indicates that the warm Arctic-cold Eurasia pattern occurred more frequently after 2003.  
416 A linear trend analysis of the time series for each node (Table [23](#)) reveals significant positive trends in  
417 occurrence frequency for nodes 1 and 4 and significant negative trends for nodes 6 and 9, which agree



418 | with the result from a previous study (Clark and Lee, 2019; [Overland et al., 2015](#)) that suggested an  
419 | increasing trend of the warm Arctic and cold Eurasia pattern.

420 |       These trends in the occurrence frequency of the SOM nodes contribute to the trends in the total  
421 | wintertime (DJF) surface temperature anomalies (Figure 8, top panel) that have significant positive  
422 | trends over the Arctic Ocean and in regions of Northern and ~~Southern~~-Eastern Europe and negative,  
423 | [mostly insignificant](#) trends in Central Siberia. The contribution, however, varies from node to node  
424 | (Figure 9). Node 1 has the largest domain-averaged contribution of 18.7%, followed by its mirror node  
425 | (node 9) at 10.1%. Nodes 4 and 6 account for 2.8% and 4.3% of the total trend, respectively. None of  
426 | the remaining nodes explain more than 2%. All nodes together explain 39.5% of the total trend in  
427 | wintertime surface air temperature. The spatial pattern of the SOM-explained trends (Figure 8, middle  
428 | panel) is similar to the warm Arctic–cold continent pattern, whereas the residual trend resembles more  
429 | the total trend (Figure 8 bottom panel).

### 430 | 3.6 Mechanisms

431 |       The results presented above indicate that the SOM patterns explain nearly 40% of the trend in  
432 | wintertime surface air temperature anomalies and majority of the contributions (35 out of 40%) come  
433 | from the two pairs of the nodes (nodes 1, 9, and 4, 6). –The analyses hereafter will focus on these four  
434 | nodes. Below we assess the atmospheric and oceanic conditions associated with the occurrences of the  
435 | four nodes via regression analysis. Specifically, the anomalous seasonal SST and atmospheric  
436 | circulation variables are regressed onto the normalized time series of the number of days when each of  
437 | the four nodes occurs (Figures 10, 11, and 12).

438 |       For node 1, the SST regression pattern in the Pacific Ocean shows significant positive anomalies  
439 | over the tropical western Pacific Ocean and central North Pacific Ocean ([Figure 10](#)). The positive SST

440 anomalies also occur over most of the North Atlantic. Negative SST anomalies occur over the central  
441 tropical Pacific Ocean, though they are not significant at 95% confidence level. The SST regression  
442 pattern is reversed for node 9. The direction of wave activity flux indicates the direction of group speed  
443 of stationary planetary wave. Here we calculate the wave activity flux defined by Takaya and  
444 Nakamura (2001), which considers the influence of mid-latitude zonal wind (Figure 12). For node 1,  
445 ~~The~~ the corresponding anomalous 500-hPa height regression (Figure 11) shows two Rossby wavetrains:  
446 one is excited over the central Pacific Ocean and propagates northeastwards into North America and  
447 North Atlantic Ocean, and the other, which displays ~~a~~ the stronger signal, originates from central North  
448 Atlantic and propagates northeastwards to the Arctic Ocean and southeastwards to the Eurasian  
449 continent ~~and the western Pacific Ocean (Figure 11 and 12). The large SST anomalies over the Nordic~~  
450 ~~Ocean augment the wave signal through local air sea interaction. The wave activity flux and~~  
451 ~~streamfunction exhibit well the horizontal propagating direction of the planetary wave.~~ For node 9, the  
452 corresponding anomalous 500-hPa height and streamfunction show an opposite pattern, but the wave  
453 activity flux is similar to that of node 1.

454 For node 4, the SST anomalies over the tropical Pacific Ocean appear to be in a La Niña state,  
455 which shows stronger negative SST anomalies over the eastern tropical Pacific Ocean than those for  
456 node 1 (Figure 10). The positive SST anomalies over the North Pacific shift more northwards relative  
457 to that of node 1. The positive SST anomalies over the North Atlantic are weaker than those for node 1.  
458 The corresponding wavetrain over the Pacific Ocean is stronger than that over the Atlantic Ocean  
459 (Figure 11), which ~~is~~ seen also be observed in the pattern of wave activity and streamfunction (Figure  
460 12). The corresponding pattern for node 6 is nearly reversed, but there are some noticeable differences  
461 in the amplitude of the wavetrain and SST anomalies. For example, the magnitude of the anomalous

462 SST and the 500-hPa height over the central North Pacific is larger for node 6 than that for node 4.

463 Besides the above-mentioned variables, similar regression analysis is also performed for the  
464 anomalous 850-hPa wind field and anomalous downward longwave radiation (~~Not-not~~ shown). Their  
465 regression patterns, which are similar to those in Figures 3 and 4, explain well the decadal variability of  
466 the number of days for nodes 1, 4, 6, and 9. Together, these results [in Figures 10-12](#) indicate that the  
467 decadal variability of the occurrence frequency of the four nodes in recent decades is related to two  
468 wavetrains induced by SST anomalies over the central North Pacific Ocean and the North Atlantic  
469 Ocean ([Figures 10 and 11](#)). The aforementioned SST regression patterns over the Atlantic and Pacific  
470 Oceans also show features of the AMO and PDO (Figure 10). Since both the AMO and PDO exhibited  
471 a phase change in the late 1990s (Yu et al., 2017), the question is whether a similar change in the SOM  
472 frequency also appear in the late 1990s. A comparison of the averaged frequency before and after 1998  
473 shows a significant drop in frequency for nodes 6 and 9 and an increase in frequency for node 1 (~~not~~  
474 [shown](#)). This result suggests that the change in the AMO and PDO indices may contribute to the change  
475 in the frequencies of the warm Arctic-cold Eurasia continent pattern.

### 476 3.7 Interdecadal variability

477 The four-decade-long ERA-Interim reanalysis is not adequate for examining interdecadal to  
478 multi-decadal variations represented by the PDO and AMO indices. Further analysis is performed using  
479 the 20CR daily reanalysis data for the 1854-2014 period. Before applying the SOM technique to the  
480 20CR data, we first remove the trend to eliminate the influence from the global warming. No low-pass  
481 filter is applied before SOM analysis in order to test the stability of the SOM results for the different  
482 periods. The spatial SOM patterns from the de-trended century-long 20CR data (Figure 13) are similar  
483 to those for the 1979-2019 period (Figure 1). Nodes 1, 4, and 7 correspond to the positive phase of the

484 warm Arctic-cold Eurasia pattern and the negative phase can be observed in nodes 3, 6, and 9. The  
485 magnitude [in Figure 13](#) is smaller compared to the recent four decades [in Figure 1](#). The occurrence  
486 frequencies of ~~all~~ the [four nodes, 1, 4, 6, and 9](#) (Figure 14), are close to those for the recent four  
487 decades ([Figure 7](#)). It indicates that the SOM method can obtain stably the main modes of wintertime  
488 surface air temperature variability. For the recent four decades, the time series of the number of days  
489 also displays a noticeable increasing (decreasing) trend for nodes 1 and 4 (6 and 9), suggesting that the  
490 trend in the recent four decades is a reflection of an interdecadal variability of wintertime surface air  
491 temperature.

492 Next, we apply a 40-year low-pass filter to the time series of the occurrence frequencies for nodes  
493 1, 4, 6 and 9 and the AMO and PDO indices and calculate correlations. There is a significant  
494 correlation between the time series and the AMO index, with correlation coefficients of 0.36 for node 1,  
495 0.27 for node 4, -0.37 for node 6, and -0.20 for node 9, all of which are at the 95% confidence level. No  
496 significant correlations, however, are found between the filtered time series and the PDO index. If we  
497 define ~~a~~ SST index to represent the variability of SST anomalies over the central North Pacific Ocean  
498 (20°N-40°N, 150°E-150°W), the 40-year low-pass filtered central North Pacific Ocean SST index is  
499 now significantly correlated with the filtered time series of occurrence frequencies for nodes 1 and 9  
500 (0.55 for node 1 and -0.46 for node 9). The [correlation](#) results are consistent with the SST regression  
501 map for the recent decades (Figure 10).

502 To confirm the effect of SST anomalies on the warm Arctic -cold Eurasia pattern, we also perform  
503 EOF analysis of wintertime detrended seasonal surface air temperature anomalies for the 1854-2014  
504 period (Figure 15). The spatial patterns of the first and second EOF modes show the negative phase of  
505 the warm Arctic-cold Eurasia pattern and the 40-year low-pass filtered time series is inversely

506 correlated with the 40-year low-pass filtered wintertime AMO index (-0.46,  $p < 0.05$  for mode 1 and  
507 -0.44,  $p < 0.05$  for mode 2). The 40-year low-pass filtered time series of the two EOF modes have a  
508 significant negative correlation with the 40-year low-pass filtered central North Pacific Ocean SST  
509 index, with correlation coefficients of -0.19 and -0.26 ( $p < 0.05$ ). Only PC1 has a significant correlation  
510 with the PDO index (0.38,  $p < 0.05$ ). Thus, the increase in the occurrence of the warm Arctic-cold  
511 Eurasia pattern in the recent decades is a part of the interdecadal variability of the pattern, which is  
512 influenced by the AMO index, [the PDO index](#), and the central North Pacific SST.

#### 513 **4 Conclusions and Discussions**

514 In this study, we examine the variability of wintertime surface air temperature in the Arctic and the  
515 Eurasian continent (20°E-130°E) by applying the SOM method to daily temperature from the gridded  
516 ERA-Interim dataset for the period 1979-2019 and from the 20CR reanalysis for the period 1854-2014  
517 and the EOF method to seasonal temperature from the 20CR reanalysis for the period 1854-2014. The  
518 spatial pattern in the surface temperature variations in the study region, as revealed by the nine SOM  
519 nodes, is dominated by concurrent warming in the Arctic and cooling in Eurasia, and vice versa. The  
520 nine SOM patterns explain nearly 40% of the trends in wintertime surface temperature and 88% of that  
521 are accounted for by only four nodes. Two of the four nodes (nodes 1 and 4) represent the warm  
522 Arctic-cold Eurasian pattern and the other two (nodes 6 and 9) depict the opposite cold Arctic-warm  
523 Eurasia pattern. There is a clear shift in the frequency of the occurrence of these patterns near the  
524 beginning of this century, with the warm Arctic – cold Eurasia pattern dominating since 2003, while the  
525 opposite pattern prevailing from the 1980s through the 1990s. The warm Arctic-cold Eurasia pattern is  
526 accompanied by an anomalous high pressure and anticyclonic circulation over the Eurasian continent.  
527 The anomalous winds and the associated temperature and moisture advection interact with local

528 | longwave radiative forcing and turbulent [fluxes](#) to produce positive (negative) temperature anomalies  
529 | in the Arctic (Eurasian continent). The circulation is reversed for the cold Arctic-warm Eurasia pattern.  
530 | The warm, moist air mass advected to the Arctic by the anomalous atmospheric circulations and the  
531 | increased downward turbulent heat flux also explain sea ice melt in the Barents and Kara Seas. In other  
532 | words, the sea ice loss in the Barents and Kara Seas and the cooling of the Eurasian continent can both  
533 | be traced to anomalous atmospheric circulations.

534 |       Increasing occurrences of the warm Arctic-cold Eurasian continent pattern appear to relate to  
535 | rising SST over the central North Pacific and North Atlantic Oceans (positive AMO phase). The SST  
536 | anomalies trigger two Rossby wavetrains spanning from the North Pacific Ocean, North America, and  
537 | the North Atlantic Ocean to the Eurasian continent. The two wavetrains are strengthened through local  
538 | sea-atmosphere-ice interactions in mid-high latitudes, which influence the change in the occurrence  
539 | frequency of the warm Arctic-cold Eurasian continent pattern. Our results agree with those of previous  
540 | studies (Lee et al., 2011; Sato et al., 2014; Clark and Lee, 2019). But previous studies only focus on the  
541 | [effects](#) of SST anomalies over either North Pacific or North Atlantic Oceans. We also note that the two  
542 | wavetrains excited by SST anomalies over different oceans differ in amplitudes, leading to somewhat  
543 | different warm Arctic-cold Eurasia patterns.

544 |       Using century-long data, we show that the warm Arctic-cold Eurasia pattern is an intrinsic climate  
545 | mode, which has been stable since 1854. The recent increasing trend in its occurrence is a reflection of  
546 | an interdecadal variability of the pattern resulting from the interdecadal variability of SST anomalies  
547 | over the central Pacific Ocean and over the Atlantic Ocean represented by the AMO index. Sung et al.  
548 | (2018) investigated interdecadal variability of the warm Arctic and cold Eurasia pattern and considered  
549 | the variability of the SST over the North Atlantic as its origin. Our results suggest that the variability of

550 the SST over the North Pacific also plays an important role. However, internal atmospheric variability  
551 remains another potential source. The Rossby wavetrains also lead to deepening of a trough in East  
552 Asia and generate an anomalous low [pressure](#) and cold temperature in northern China ([Figure 10](#)),  
553 which further suggests that ~~the relationship between~~ a warmer Arctic, especially warmer Barents and  
554 Kara Seas ~~, and is not the driver for~~ the [increasing](#) occurrence of cold spells in East Asia, [as](#)  
555 [suggested in](#) ~~may not be as strong as~~ [previously thought studies](#) (Kim et al., 2014; Mori et al., 2014;  
556 Kug et al., 2015; Overland et al., 2015).

557 [Our results suggest that the increasing trend in warm Arctic-cold Eurasia pattern may be related to](#)  
558 [the anomalous SST over the central North Pacific and the North Atlantic Oceans. But we cannot rule](#)  
559 [out the influence of the Arctic sea ice loss on the trend. Because the](#) ~~The Arctic sea ice loss results from~~  
560 [two main drivers: external and internal forcings. The former refers to the both Arctic warming due to](#)  
561 [anthropogenic increasing of greenhouse gas concentrations and natural variability of ; the latter comes](#)  
562 [from the climate system internal variability, such as anomalous SST anomalies. This study considers](#)  
563 [natural variability or only the internal driver of climate system. The Arctic warming caused external](#)  
564 [forcing related to increasing greenhouse gas emissions can produce an anomalous anticyclone over the](#)  
565 [Barents and Kara Seas, leading to the warm Arctic-cold continents pattern.](#)

566 [Although the ERA-Interim reanalysis is overall superior in describing](#) ~~has the best performance in~~  
567 [overall depiction of the Arctic atmospheric environment to other similar global reanalysis products, it](#)  
568 [contains](#) ~~includes~~ [warm and moist biases in the surface layer \(Jakobson et al., 2012; Chaudhuri et al.,](#)  
569 [2014; Simmons and Poli, 2015; Wang et al., 2019\). However, we believe these biases, as well as the](#)  
570 [relatively coarse resolution, should have minimum impact in the results from the current analyses.](#)  
571 [Further, although the current analyses were performed on a predetermined SOM grid with 3x3 nodes,](#)

572 [an increase in the number of SOM nodes didn't change the conclusions.](#)

573 Our results help broaden the current understanding of the formation mechanisms for the warm  
574 Arctic-cold Eurasia pattern. The SST anomalies over Northern Hemisphere oceans may offer a  
575 potential for predicting its occurrence. [The statistical relationship between SST anomalies and the](#)  
576 [occurrences of the warm Arctic-cold continents pattern may help improve the predictability of](#)  
577 [wintertime surface air temperature over Eurasian continent on interdecadal time scales.](#)

### 578 **Data Availability**

579 All data used in the current analyses are publicly available. The monthly sea ice concentration data are  
580 available from the National Snow and Ice Data Center (NSIDC) (<http://nsidc.org/data/NSIDC-0051>), the  
581 ERA-Interim reanalysis data are available from the European Center for Mid-Range Weather  
582 Forecasting (<https://www.ecmwf.int/en/forecasts/datasets/reanalysis-datasets/era-interim>) and the sea  
583 surface temperature data are available from the Hadley Centre for Climate Prediction and Research  
584 (<ftp://ftp.cdc.noaa.gov/Datasets/noaa.oisst.v2.highres/>). The long-term SST data are derived from  
585 from the Twentieth Century Reanalysis project, version 2c (20CR)  
586 (<https://climatedataguide.ucar.edu/climate-data/noaa-20th-century-reanalysis-version-2-and-2c>).

### 587 **Competing interests**

588 The authors declare that they have no conflict of interest.

### 589 **Author Contributions**

590 L. Yu designed the study, with input from S. Zhong, and carried out the analyses. L. Yu and S. Zhong  
591 prepared the manuscript. C. Sui plotted a part of Figures. [-B. Sun revised the manuscript.](#)

592 **Acknowledgements** We thank the European Centre for Medium-Range Weather Forecasts (ECMWF)  
593 for the ERA-Interim data. This study is financially supported by the National Key R&D Program of  
594 China (2019YFC1509102; 2017YFE0111700) and the National Natural Science Foundation of China  
595 (41922044).

596



597

598

599

600

601

602

603

604

605

606

607 **References**

608 Barnes, E. A. and Screen, J. A.: The impact of Arctic warming on the midlatitude jet-stream: Can it?

609 Has it? Will it?, WIREs Clim. Change, 6, 277-286, doi:10.1002/wcc.337, 2015.

610 Blackport, R., Screen J. A., Wiel K. van der, and Bintanja, R.: Minimal influence of reduced Arctic sea

611 ice on coincident cold winters in mid-latitudes, Nature Climate Change, 9,

612 doi:10.1038/s41558-019-0551-4, 2019, 2019.

613 [Chaudhuri, A. H., Ponte, R. M., and Nguyen, A. T.: A Comparison of atmospheric reanalysis products](#)

614 [for the Arctic Ocean and implications for uncertainties in air-sea fluxes, J. Climate, 27,](#)

615 [5411-5421, doi:10.1175/JCLI-D-13-00424.1, 2014.](#)

616 [Chen, L., Francis J. and Hanna E.: The “Warm-Arctic/Cold continents” pattern during 1901-2010.](#)

617 [Int. J. Climatol., 38, 5245-5254, ~~https://doi.org/doi:10.1002/joc.5725~~, 2018.](#)

618 Clark, J. P. and Lee, S.: The role of the tropically excited Arctic Warming Mechanism on the warm

619 Arctic cold continent surface air temperature trend pattern, *Geophys. Res. Lett.*, 46, 8490-8499,  
620 doi:10.1029/2019GL082714, 2019

621 Cohen, J., Screen, J. A., Furtado, J. C., Barlow, M., Whittleston, D., Coumou, D., Francis, J., Dethloff,  
622 K., Entekhabi, D., Overland, J., and Jones, J.: Recent Arctic amplification and extreme  
623 mid-latitude weather, *Nat. Geosci.*, 7, 627-637, doi:10.1038/ngeo2234, 2014.

624 Cohen, J., Pfeiffer, K., and Francis, J. A.: Warm Arctic episodes linked with increased frequency of  
625 extreme winter weather in the United States, *Nat. Commun.*, 9, 869,  
626 doi:10.1038/s41467-018-02992-9, 2018.

627 Compo, G. P., Whitaker, J. S., Sardeshmukh, P. D., Matsui, N., Allan, R., Yin, X., Jr, G. B. E., Vose, R.  
628 S., Rutledge, G. K., Bessemoulin, P., Brönnimann, S., Brunet, M., Crouthamel, R. I., Grant, A.  
629 N., Groisman, P. Y., Jones, P. D., Kruk, M. C., Kruger, A. C., Marshall, G. J., Maugeri, M., Mok,  
630 H. Y., Nordli, Ø., Ross, T. F., Trigo, R. M., Wang, X., Woodruff, S. D., and Worley S. J.: The  
631 Twentieth Century Reanalysis Project, *Quart. J. Roy. Meteor. Soc.*, 137, 1-28,  
632 doi:10.1002/qj.776, 2011.

633 Dee, D. P., Uppala, S. M., Simmons, A. J., Berrisford, P., Poli, P., Kobayashi, S., Andrac, U.,  
634 Balmaseda, M. A., Balsamo, G., Bauer, P., Bechtold, P., Beljaars, A. C. M., van de Berg, L.,  
635 Bidlot, J., Bormann, N., Delsol, C., Dragani, R., Fuentes, M., Geer, A. J., Haimberger, L., Healy,  
636 S. B., Hersbach, H., Hõm, E. V., Isaksen, L., Kålberg, P., Köhler, Matricardi, M., McNally, A.  
637 P., Monge-Sanz, B. M., Morcrette, J.-J., Park, B.-K., Peubey, C., de Rosnay, P., Tavolato, C.,  
638 Thépaut, J.-N., and Vitart, F.: The ERA-Interim reanalysis: configuration and performance of the  
639 data assimilation system. *Q. J. R. Meteorol. Soc.*, 137, 553-597, doi:10.1002/qj.828, 2011.

640 Enfield, D. B., Mestas-Nunez, A. M., and Trimble, P. J.: The Atlantic multidecadal oscillation and it's

641 relation to rainfall and river flows in the continental U.S., *Geophys. Res. Lett.*, 28, 2077-2080,  
642 2001.

643 Fyfe, J. C.: Midlatitudes unaffected by sea ice loss. *Nature Climate Change*, 9,  
644 doi:10.1038/s41558-019-0560-3, 2019 .

645 Gibson, P. B., Perkins-Kirkpatrick, S. E., Uotila, P., Pepler, A. S., and Alexander, L. V.: On the use of  
646 self-organizing maps for studying climate extremes, *J. Geophys. Res. Atmos.*, 122, 3891–3903,  
647 [doi:10.1002/2016JD026256](https://doi.org/10.1002/2016JD026256), 2017.

648 Hoskins, B. and Woollings, T.: Persistent extratropical regimes and climate extremes. *Curr. Clim. Change*  
649 *Rep.*, 1, 115-124, doi:10.1007/s40641-015-0020-8, 2015

650 Horton, D. E., Johnson, N. C., Singh, D., Swain, D. L., Rajaratnam, B., and Diffenbaugh, N. S.:  
651 Contribution of changes in atmospheric circulation patterns to extreme trends, *Nature*,  
652 522,465-469, doi:10.1038/nature14550, 2015.

653 Inoue, J., Hori, M. E., and Takaya, K.: The role of Barents Sea ice in the wintertime cyclone track and  
654 emergence of a warm-Arctic-Siberian anomaly, *J. Clim.*, 25, 2561-2568,  
655 doi:10.1175/JCLI-D-11-00449.1, 2012.

656 Jakobson, E., Vihma, T., Palo, T., Jakobson, L., Keernik, H., and Jaagus, J.: Validation of atmospheric  
657 reanalyses over the central Arctic Ocean, *Geophys. Res. Lett.*, 39, L10802,  
658 doi:10.1029/2012GL051591, 2012.

659 Johnson, N. C. and Feldstein, S. B.: The continuum of North Pacific sea level pressure patterns:  
660 Intraseasonal, interannual, and interdecadal variability, *J. Clim.*, 23,  
661 851-867, doi:10.1175/2009JCLI3099.1, 2010.

662 [Jakobson, E., Vihma, T., Palo, T., Jakobson, L., Keernik, H., Jaagus, J.: Validation of atmospheric](#)

663 | [reanalyses over the central Arctic Ocean, \*Geophys. Res. Lett.\*, 39, 2012.](#)

664 Kalnay, E., Kanamitsu, M., Kistler, R., Collins, W. G., Deaven, D., Gandin, L., Iredell, M., Saha, S.,  
665 White, G., Woollen J.: The NCEP/NCAR 40-year reanalysis project, *Bull. Amer. Meteor. Soc.*,  
666 77, 437-471, doi:10.1175/1520-0477(1996)077<0437:TNYRP>2.0.CO;2, 1996.

667 Kim, B.-M., Son, S.-W., Min, S.-K., Jeong, J.-H., Kim, S.-J., Zhang, X., Shim, T., and Yoon, J.-H.:  
668 Weakening of the stratospheric polar vortex by Arctic sea-ice loss, *Nature Commun.*, 5, 4646,  
669 doi:10.1038/ncomms5646, 2014.

670 Kohonen, T.: *Self-Organizing Maps*. 3<sup>rd</sup> ed. Springer, 501 pp, 2001.

671 Kug, J.-S., Jeong, J.-H., Jang, Y.-S., Kim, B.-M., Folland, C. K., Min, S.-K., and Son, S.-W.: Two  
672 distinct influences of Arctic warming on cold winters over North America and East Asia, *Nat.*  
673 *Geosci.*, 8, 759-762, doi:10.1038/ngeo2517, 2015.

674 Lee, S., Gong, T., Johnson, N., Feldstein, S. B., and Pollard, D.: On the possible link between tropical  
675 convection and the Northern Hemisphere Arctic surface air temperature change between 1958  
676 and 2001, *J. Clim.*, 24, 4350-4367, doi:10.1175/2011JCLI4003.1, 2011.

677 Lee, S. and Feldstein, S. B.: Detecting ozone- and greenhouse gas-driven wind trends with  
678 | observational data, *Science*, 339, 563-567, [doi:10.1126/science.1225154](#), 2013.

679 Loikith, P. C. and Broccoli, A. J.: Comparison between observed and model-simulated atmospheric  
680 circulation patterns associated with extreme temperature days over North America using CMIP5  
681 historical simulations, *J. Clim.*, 28, 2063-2079, doi:10.1175/JCLI-D-13-00544.1, 2015.

682 Luo, D., Xiao, Y., Yao, Y., Dai, A., Simmonds, I., and Franzke, C. L. E.: Impact of Ural blocking on  
683 winter warm Arctic-cold Eurasian anomalies. Part I: Blocking-induced amplification, *J. Clim.*,  
684 29, 3925-3947, doi:10.1175/JCLI-D-15-0611.1, 2016.

685 Mantua, N. J., Hare, S. R., Zhang, Y., Wallace, J. M., and Francis, R. C.: A Pacific interdecadal climate  
686 oscillation with impacts on salmon production, *Bull. Amer. Meteor. Soc.*, 78, 1069–1079, 1997.

687 Matsumura, S. and Kosaka, Y.: Arctic-Eurasian climate linkage induced by tropical ocean variability,  
688 *Nature Communications*, 10, 3441, doi:10.1038/s41467-019-11359-7, 2019.

689 Mori, M., Watanabe, M., Shiogama, H., Inoue, J., and Kimoto, M.: Robust Arctic sea-ice influence on  
690 the frequent Eurasian cold winters in past decades, *Nat. Geosci.*, 7, 869-873,  
691 doi:10.1038/ngeo2277, 2014.

692 Mori, M., Kosaka, Y., Watanabe, M., Nakamura, H., and Kimoto, M.: A reconciled estimate of the  
693 influence of Arctic sea-ice loss on recent Eurasian cooling, *Nat. Clim. Change*, 9, 123-129,  
694 doi:10.1038/s41558-018-0379-3, 2019.

695 McCusker, K. E., Fyfe, J. C., and Sigmond, M.: Twenty-five winters of unexcepted Eurasian cooling  
696 unlikely due to Arctic sea-ice loss, *Nat. Geosci.*, 9, 838-842, doi:10.1038/ngeo2820, 2016.

697 Overland, J. E., Wood, K. R., and Wang, M.: Warm Arctic-cold continents: climate impacts of the  
698 newly open Arctic sea, *Polar Res.*, 30, 15787, doi:10.3402/polar.v30i0.15787, 2011.

699 Overland, J. E., Francis, J., Hall, R., Hanna, E., Kim, S.-J., and Vihma, T.: The melting Arctic and  
700 Midlatitude weather patterns: Are they connected?, *J. Clim.*, 28, 7917-7932,  
701 doi:10.1175/JCLI-D-14-00822.1, 2015.

702 Palmer, T. N.: A nonlinear dynamical perspective on climate prediction, *J. Clim.*, 12, 575-591, 1999.  
703 doi:10.1175/1520-0442(1999)012<0575:ANDPOC>2.0.CO;2

704 Peings, Y.: Ural blocking as a driver of early-winter stratospheric warmings, *Geophys. Res. Lett.*, 46,  
705 5460-5468, doi:10.1029/2019GL082097, 2019.

706 Reusch, D. B., Alley, R. B., and Hewitson, B. C.: Relative performance of self-organizing maps and

707 principal component analysis in pattern extraction from synthetic climatological data, *Polar*  
708 *Geogr.*, 29, 188–212, doi:10.1080/789610199, 2005.

709 Reynolds, R. W., Smith, T. M., Liu, C., Chelton, D. B., Casey, K. S., Schlax, M. G.: Daily  
710 High-Resolution-Blended Analyses for Sea Surface Temperature, *J. Climate*, 20, 5473-5496,  
711 doi:10.1175/2007JCLI1824.1, 2007.

712 Sammon, J. W.: A non-linear mapping for data structure analysis. *IEEE Trans. Computers*, C-18,  
713 401–409 , 1969.

714 Sato, K., Inoue, J., and Watanabe, M.: Influence of the Gulf Stream on the Barents Sea ice retreat and  
715 Eurasian coldness during early winter, *Environ. Res. Lett.*, 9, 084009,  
716 doi:10.1088/1748-9326/9/8/084009, 2014.

717 Schudeboom, A., McDonald, A. J., Morgenstern, O., Harvey, M., and Parsons, S.: Regional  
718 regime-based evaluation of present-day GCM cloud simulations using self-organizing maps, *J.*  
719 *Geophys. Res. Atmos.*, 123, 4259–4272, doi:10.1002/2017JD028196, 2018.

720 Screen, J. A. and Simmonds, I.: The central role of diminishing sea ice in recent Arctic temperature  
721 amplification, *Nature*, 464, 1334-1337, doi:10.1038/nature09051, 2010.

722 Screen, J. S. and Simmonds, I.: Erroneous Arctic temperature trends in the ERA-40 reanalysis: A closer  
723 look, *J. Clim.*, 24, 2620–2627, doi:10.1175/2010JCLI4054.1, 2011.

724 Sedlar, J., Tjernström, M., Mauritsen, T., Shupe, M. D., Brooks, I. M., Persson, O., Birch, C. E., Leck,  
725 C., Sirevaag, A., and Nicolaus, M. : A transitioning Arctic surface energy budget: The impacts of  
726 solar zenith angle, surface albedo and cloud radiative forcing, *Clim. Dyn.*, 37, 1643–1660,  
727 [doi:10.1007/s00382-010-0937-5](https://doi.org/10.1007/s00382-010-0937-5), 2011.

728 Shepherd, T. G.: Effects of a warming Arctic, *Science*, 353, 989-990, doi:10.1126/science.aag2349,

729 2016.

730 [Simmons, A., and Poli, P.: Arctic warming in ERA-Interim and other analyses, Q. J. R. Meteorol. Soc.,](#)  
731 [141, 1147-1162, doi:10.1002/qj.2422, 2015.](#)

732 Skific, N., Francis, J. A., and Cassano, J. J.: Attribution of projected changes in atmospheric moisture  
733 transport in the Arctic: A self-organizing map perspective, J. Clim., 22, 4135-4153,  
734 doi:10.1175/2009JCLI2645.1, 2009.

735 Sorokina, S. A., Li, C., Wettstein, J. J., and Kvamstø N. G.: Observed atmospheric coupling between  
736 Barents sea ice and the warm-Arctic cold-Siberian anomaly pattern, J. Clim., 29, 495-511,  
737 doi:10.1175/JCLI-D-15-0046.1, 2016.

738 Stroeve, J. C., , Holland, M. M., Meier, W., Scambos, T., and Serreze, M.: Arctic sea ice decline: faster  
739 than forecast, Geophys. Res. Lett., 34, L09051, doi:10.1029/2007gl029703, 2007.

740 Stroeve, J. C.: Trends in Arctic sea ice extent from CMIP5, CMIP3 and observations, Geophys. Res.  
741 lett., 39, L16502, doi:10.1029/2012GL052676 , 2012.

742 Sun, L., Perlwitz, J., and Hoerling, M.: What caused the recent “warm Arctic-Cold Continents” trend  
743 pattern in winter temperature?, Geophys. Res. Lett., 43, 5345-5352,  
744 doi:10.1002/2016GL069024, 2016.

745 Sung, M.-K., Kim, S.-H., Kim, B.-M., and Choi, Y.-S.: Interdecadal variability of the warm Arctic and  
746 cold Eurasia pattern and its North Atlantic origin, Journal of Climate, 31, 5793-5810,  
747 doi:10.1175/JCLI-D-17-0562.1, 2018.

748 Tang, Q., Zhang, X., Yang, X., and Francis J. A.: Cold winter extremes in northern conditions linked to  
749 Arctic sea ice loss, Environ. Res. Lett., 8, 014036, doi:10.1088/1748-9326/8/1/014036 ,2013.

750 Takaya K, and Nakamura, H.: A formulation of a phase-independent wave-activity flux for stationary

751 and migratory quasigeostrophic eddies on a zonally varying basic flow, *J. Atmos. Sci.*, 58,  
752 608-627, 2001.

753 Uppala, S., KÅllberg, P. W., Simmons, A. J., Andrae, U., Da Costa Bechtold, V., Florino, M., Gibson, J.  
754 K., Haseler, J., Hernandez, A., Kelly, G. A., Li, X., Onogi, K., Saarinen, S., Sokka, N., Allan, R.  
755 P., Andersson, E., Arpe, K., Balmaseda, M. A., Beljaars, A. C. M., Van De Berg, L., Bidlot, J.,  
756 Bormann, N., Caires, S., Chevallier, F., Dethof, A., Dragosavac, M., Fisher, M., Fuentes, M.,  
757 Hagemann, S., Hm, E., Hoskins, B. J., Isaksen, L., Janssen, P. A. E. M., Jenne, R., McNally, A.  
758 P., Mahfouf, J.-F., Morcrette, J.-J., Rayner, N. A., Saunders, R. W., Simon, P., Sterl, A.,  
759 Trenberth, K. E., Untch, A., Vasiljevic, D., Viterbo, P., and Woollen, J.: The ERA-40 re-analysis,  
760 *Quarterly Journal of the Royal Meteorological Society*, 131, 2961–3012, doi:10.1256/qj.04.176,  
761 2005.

762 Walsh, J. E.: Intensified warming of the Arctic: Causes and impacts on middle Latitudes, *Glob. Planet.*  
763 *Change*, 117, 52-63, doi:10.1016/j.gloplacha.2014.03.003 , 2014.

764 Vihma, T.: Effects of Arctic sea ice decline on weather and climate: A review, *Surv. Geophys.*, 35,  
765 1175-1214, doi:10.1007/s10712-014-9284-0 , 2014.

766 Vihma, T., Graverson, R., Chen, L., Handorf, D., Skific, N., Francis, J. A., Tyrrell, N., Hall, R., Hanna,  
767 E., Uotila, P., Dethloff, K., Karpechko, A. Y., Bj rnsson, H., and Overland, J. E.: Effects of the  
768 tropospheric large-scale circulation on European winter temperatures during the period of amplified  
769 Arctic warming, *Int. J. Climatol.*, doi:10.1002/joc.6225, 2019.

770 [Wang, C., Graham, R. M., Wang, K., Gerland, S., Granskog, M. A.: Comparison of ERA5 and](#)  
771 [ERA-Interim near-surface air temperature, snowfall and precipitation over Arctic sea ice: effects](#)  
772 [on sea ice thermodynamics and evolution, \*The Cryosphere\*, 13, 1661-1679, 2019.](#)



773 Yoo, C., Feldstein, S., and Lee, S.: The impact of the Madden–Julian oscillation trend on the Arctic  
774 amplification of surface air temperature during the 1979–2008 boreal winter, *Geophys. Res.*  
775 *Lett.*, 38, L24804, doi:10.1029/2011GL049881, 2011.

776 Yu, L., Zhong, S., Winkler, J. A., Zhou, M., Lenschow, D. H., Li, B., Wang, X., and Yang, Q.: Possible  
777 connections of the opposite trends in Arctic and Antarctic sea-ice cover, *Scientific Reports*, 7,  
778 45804, doi:10.1038/srep45804, 2017.

779

780

781

782 Table 1. Spatial correlations (Corrs) between the daily winter (DJF) surface air  
 783 temperature and the corresponding SOM pattern for each day from 1979 to 2018.

|      | 3×1  | 2×2  | 3×2  | 4×2  | 3×3  | 5×2  | 4×3  | 5×3  | 4×4  |
|------|------|------|------|------|------|------|------|------|------|
| Corr | 0.26 | 0.43 | 0.48 | 0.48 | 0.50 | 0.49 | 0.50 | 0.51 | 0.51 |

784

785

786

787

788

789

790

791

792

793

794

795

796

797

798

799

800

801

802

803

804

805

806

807

808

809

810

811

812

813

814 Table 2. Averaged anomalous NAO and AO indices for all occurrences of each SOM  
 815 node. Asterisks indicate the above 95% confidence level.

816

|     | Node1 | Node2 | Node3 | Node4 | Node5  | Node6 | Node7  | Node8  | Node9  |
|-----|-------|-------|-------|-------|--------|-------|--------|--------|--------|
| NAO | 0.38* | 0.22* | 0.12* | 0.05  | -0.22* | -0.02 | -0.07  | -0.31* | -0.32* |
| AO  | 0.44* | 0.38* | 1.03* | -0.42 | -0.62* | 0.22* | -0.44* | -1.11* | -0.41* |

817

818

819

820

821

822

823

824

825

826

827

828

829

830

831

832

833

834

835

836

837

838

839

840

841

842

843

844

845

846

847

848

849

850

851

852

853

854

855 Table 3. Trends in the frequency of occurrences for each SOM node (day yr<sup>-1</sup>).  
856 Asterisks indicate the above 95% confidence level.

857

|       | Node1 | Node2 | Node3 | Node4 | Node5 | Node6  | Node7 | Node8 | Node9  |
|-------|-------|-------|-------|-------|-------|--------|-------|-------|--------|
| Trend | 0.80* | 0.10  | -0.18 | 0.22* | -0.02 | -0.39* | 0.17  | -0.17 | -0.50* |

858

859

860

861

862

863

864

865

866

867

868

869

870

871

872

873

874

875

876

877

878

879

880

881

882

883

884

885

886

887

888

889

890

891

892

893

894

895 Table 4. Frequencies of occurrence (%) of wintertime surface air temperature patterns  
 896 in Figure 1 for all winters before 1998 and after 1998 for the period 1979-2019.  
 897 Values with Asterisks are significantly different from climatology above the 95%  
 898 confidence level.

| SOM patterns | Frequencies of occurrence |                     |                    |
|--------------|---------------------------|---------------------|--------------------|
|              | All winters               | Winters before 1998 | Winters after 1998 |
| Node 1       | 17.1                      | 7.4*                | 26.8               |
| Node 2       | 4.4                       | 3.3                 | 5.4                |
| Node 3       | 17.2                      | 18.8                | 15.6               |
| Node 4       | 8.6                       | 5.4                 | 11.7               |
| Node 5       | 3.4                       | 3.4                 | 3.5                |
| Node 6       | 10.2                      | 15.2*               | 2.1*               |
| Node 7       | 13.7                      | 10.6                | 16.8               |
| Node 8       | 10.1                      | 12.1                | 8.0                |
| Node 9       | 15.4                      | 23.7*               | 7.1*               |

900  
 901  
 902  
 903  
 904  
 905  
 906  
 907  
 908  
 909  
 910  
 911  
 912  
 913  
 914  
 915  
 916  
 917  
 918  
 919  
 920  
 921  
 922  
 923  
 924  
 925  
 926

927 **Figure Captions**

928 Figure 1. Spatial patterns of SOM nodes for daily wintertime (December, January, and  
929 February) surface air temperature anomalies ( $^{\circ}\text{C}$ ) without removing their linear trends  
930 from ERA-Interim reanalysis over the 1979-2019 period. The number in brackets  
931 denotes the frequency of the occurrence for each node.

932 Figure 2. Corresponding 500-hPa geopotential height anomalies (gpm) without  
933 removing their linear trends from ERA-Interim reanalysis over the 1979-2019 period  
934 for each node in Figure 1. Dotted regions indicate the above 95% confidence level.  
935 The thick black lines show the study region.

936 Figure 3. Corresponding anomalous 850-hPa wind field ( $\text{ms}^{-1}$ ) without removing ~~the~~  
937 its linear trend from ERA-Interim reanalysis over the 1979-2019 period for each node  
938 in Figure 1. Shaded regions indicate the above 95% confidence level. The thick black  
939 lines show the study region.

940 Figure 4. Corresponding anomalous daily accumulated downward longwave radiation  
941 ( $105 \text{ W m}^{-2}$ ) without removing ~~the~~ its linear trend from ERA-Interim reanalysis over  
942 the 1979-2019 period for each node in Figure 1. Dotted regions indicate the above 95%  
943 confidence level. The thick black lines denote show the study region.

944 Figure 5. Corresponding anomalous daily accumulated turbulent heat flux (sensible  
945 and latent heat) ( $10^5 \text{ W m}^{-2}$ ) without removing their linear trends from ERA-Interim  
946 reanalysis over the 1979-2019 period for each node in Figure 1. Positive values  
947 denote heat flux from atmosphere to ocean and vice versa. Dotted regions indicate the  
948 above 95% confidence level. The thick black lines denote show the study region.

949 Figure 6. Corresponding anomalous wintertime sea ice concentration without  
950 removing ~~the-its linear~~ trend from the NSIDC over the 1979-2019 period for each  
951 node in Figure 1. Dotted regions indicate the above 95% confidence level.

952 Figure 7. Time series of the number of days for occurrence of each SOM node in  
953 Figure 1 over the 1979-2019 period. The thick lines denote the trend in time series.

954 Figure 8. Total (top), SOM-explained (middle), and residual (bottom) trend in  
955 wintertime (DJF) surface air temperature ( $^{\circ}\text{C yr}^{-1}$ ) over the 1979-2019 period. Dots in  
956 the top panel indicate above 95% confidence level.

957 Figure 9. Trends in surface air temperature explained by each SOM node ( $^{\circ}\text{C yr}^{-1}$ )  
958 over the 1979-2019 period. The percentage in the upper of each panel indicates the  
959 fraction of the total trend represented by each node.

960 Figure 10. Anomalous SST ( $^{\circ}\text{C}$ ) regressed into the normalized time series of  
961 occurrence number for nodes 1, 4, 6, and 9 without removing ~~the-its linear~~ trend from  
962 the NOAA over the 1979-2019 period.

963 Figure 11. Anomalous 500-hPa geopotential height (gpm) regressed into the  
964 normalized time series of occurrence number for nodes 1, 4, 6, and 9 without  
965 removing ~~the-its linear~~ trend from ERA-Interim reanalysis over the 1979-2019 period.

966 Figure 12. The anomalous wave activity flux (vectors) (Takaya and Nakamura, 2001)  
967 and stream function (colors, units:  $10^7 \text{ m}^2 \text{ s}^{-1}$ ) regressed onto the normalized time  
968 series of occurrence number for nodes 1, 4, 6, and 9 without removing ~~the-their linear~~  
969 trends from ERA-Interim reanalysis over the 1979-2019 period.

970 Figure 13. Spatial patterns of SOM nodes for detrended daily wintertime (December,

971 January, and February) surface air temperature anomalies ( $^{\circ}\text{C}$ ) from the 20CR  
972 reanalysis for the 1851-2014 period. The number in brackets denotes the frequency of  
973 the occurrence for each node.

974 Figure 14. Time series of the number of days for occurrence of each SOM node in  
975 Figure 13 from the 20CR reanalysis for the 1851-2014 period. The thick red lines  
976 denote the result in Figure 7 from the ERA-Interim reanalysis for the 1979-2019  
977 period.

978 Figure 15. The (a) leading pattern and (b) its time series (PC1 and PC2) of EOF  
979 analysis of wintertime surface air temperature anomalies from the 20CR reanalysis for  
980 the 1851-2014 period. Prior to EOF analysis, surface air temperature data are  
981 detrended. A 40-yr low-pass filter is applied to the time series of PC1, PC2, AMO,  
982 PDO, and central North Pacific Ocean (CNPO) indices. The correlation coefficients  
983 between PC1 and AMO, PDO and CNPO indices are -0.46 ( $p < 0.0001$ ), 0.38  
984 ( $p < 0.0001$ ), and -0.19 ( $p = 0.019$ ); those between PC2 and AMO, PDO and CNPO  
985 indices are -0.44 ( $p < 0.0001$ ), 0.38 ( $p < 0.0001$ ), and -0.26 ( $p = 0.0009$ ).

986

987

988

989

990

991

992



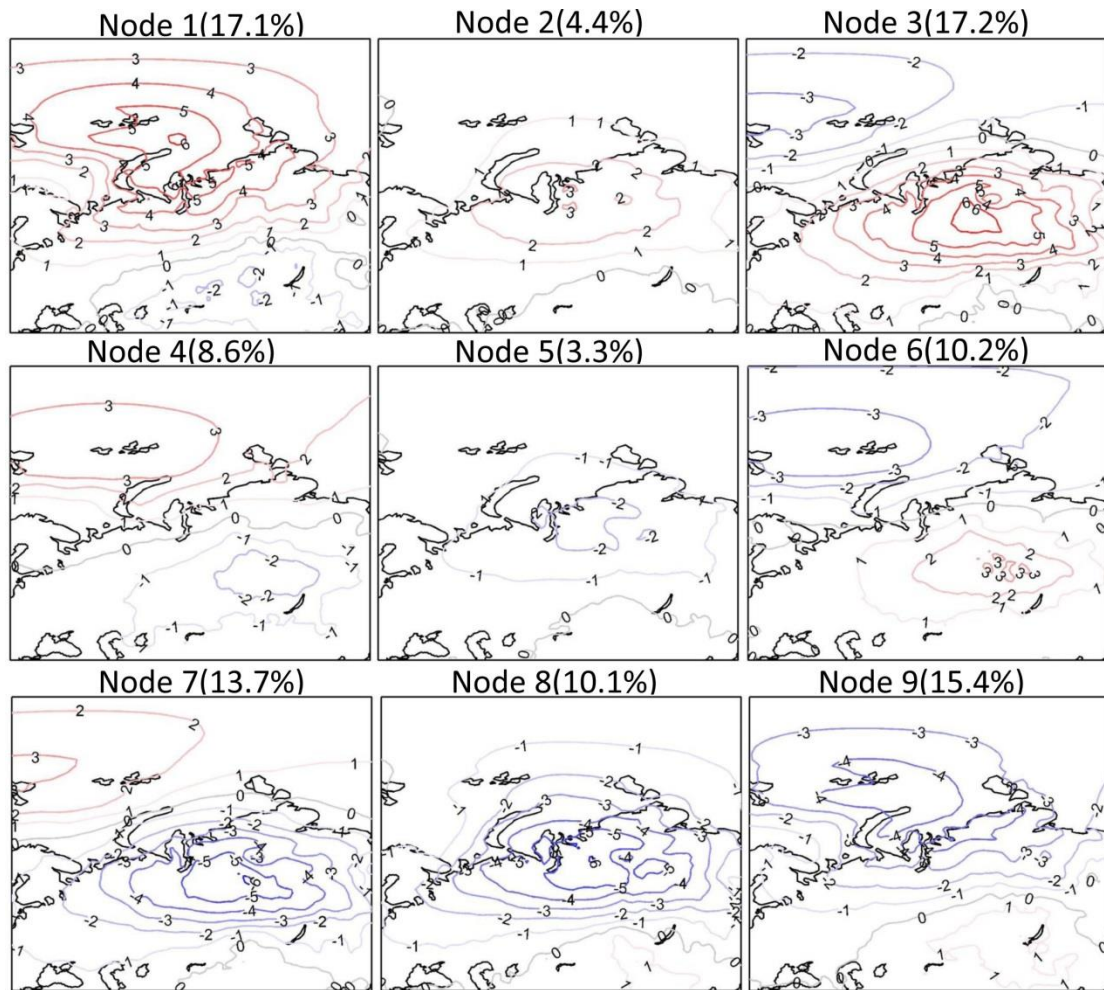

994

995 Figure 1. Spatial patterns of SOM nodes for daily wintertime (December, January, and February)  
 996 surface air temperature anomalies (°C) without removing their linear trends from ERA-Interim  
 997 reanalysis over the 1979-2019 period. The number in brackets denotes the frequency of the  
 998 occurrence for each node.

999

1000

1001

1002

1003

1004

1005

1006

1007

1008

1009

1010

1011

1012

1013

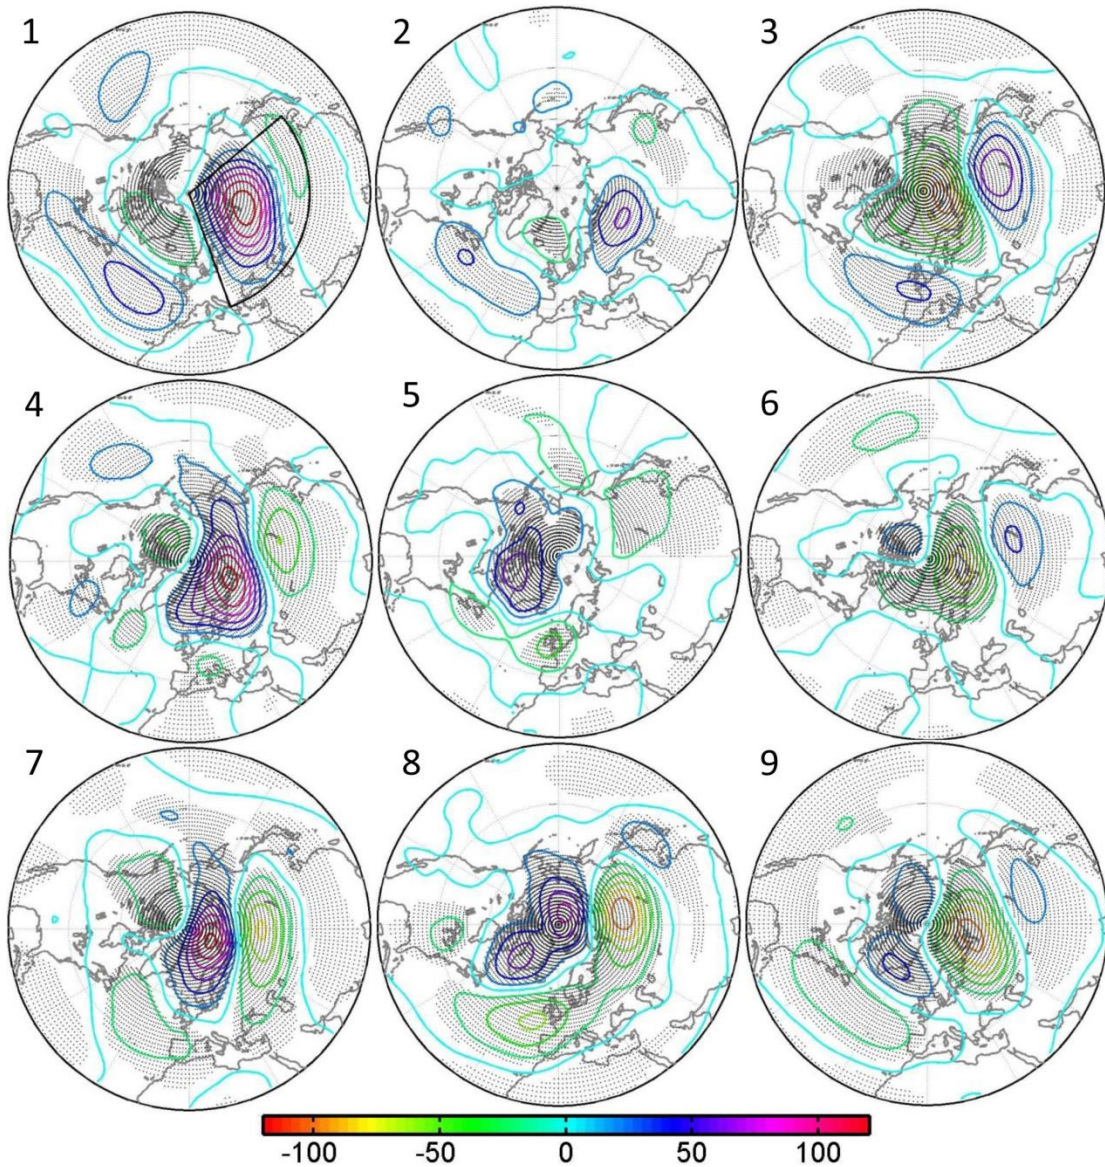

1015  
 1016  
 1017  
 1018  
 1019  
 1020  
 1021  
 1022  
 1023  
 1024  
 1025  
 1026  
 1027  
 1028  
 1029  
 1030

Figure 2. Corresponding 500-hPa geopotential height anomalies (gpm) without removing their linear trends from ERA-Interim reanalysis over the 1979-2019 period for each node in Figure 1. Dotted regions indicate the above 95% confidence level. The thick black lines denote-show the study region.

1031  
1032  
1033

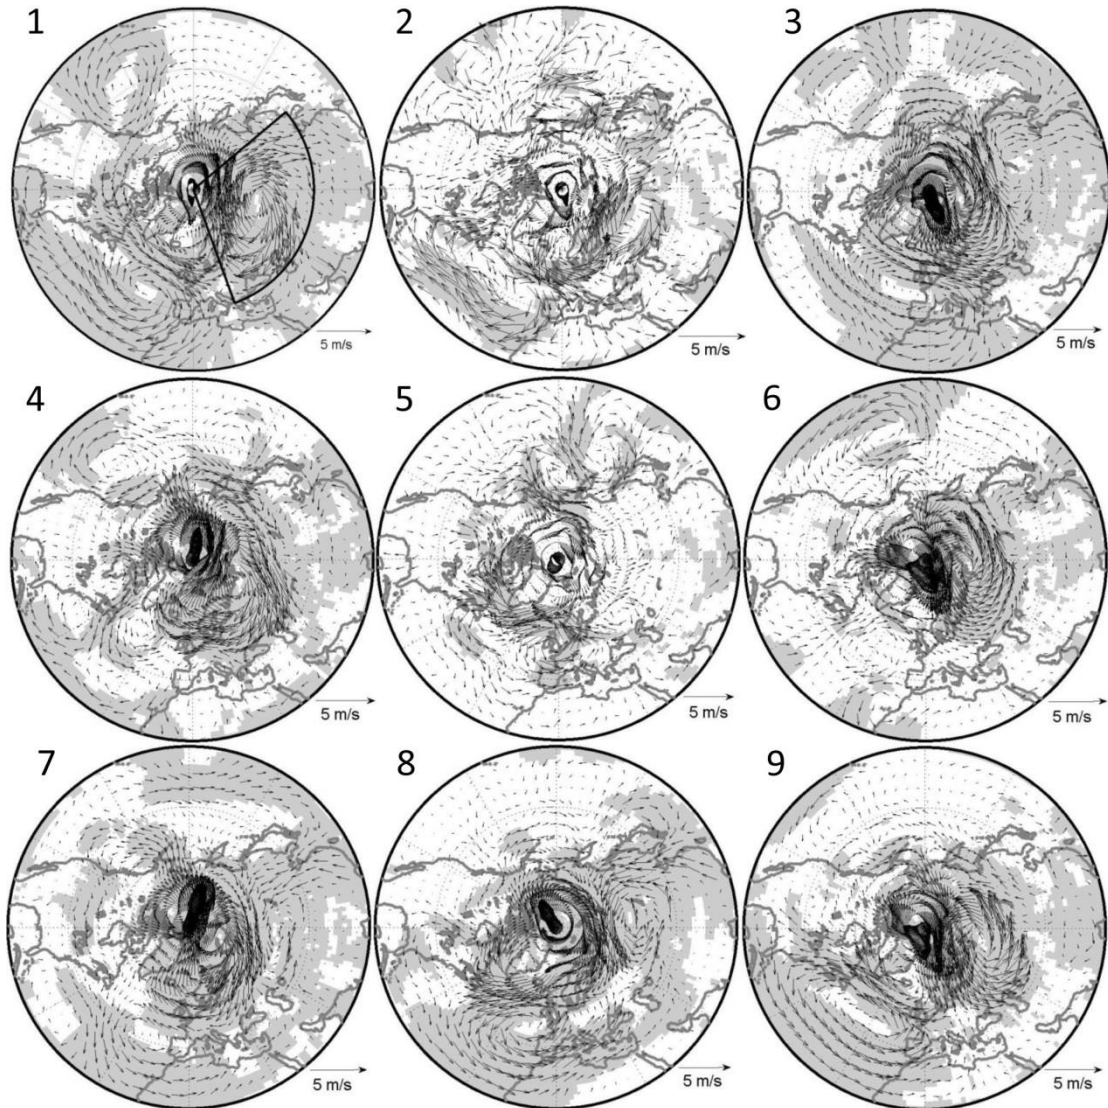

1034  
1035  
1036  
1037  
1038  
1039  
1040  
1041  
1042  
1043  
1044  
1045  
1046  
1047  
1048

Figure 3. Corresponding anomalous 850-hPa wind field ~~( $\text{ms}^{-1}$ )~~ without removing its linear trend from ERA-Interim reanalysis over the 1979-2019 period for each node in Figure 1. Shaded regions indicate the above 95% confidence level. The thick black lines ~~denotes~~ show the study region.

1049  
1050  
1051  
1052  
1053  
1054

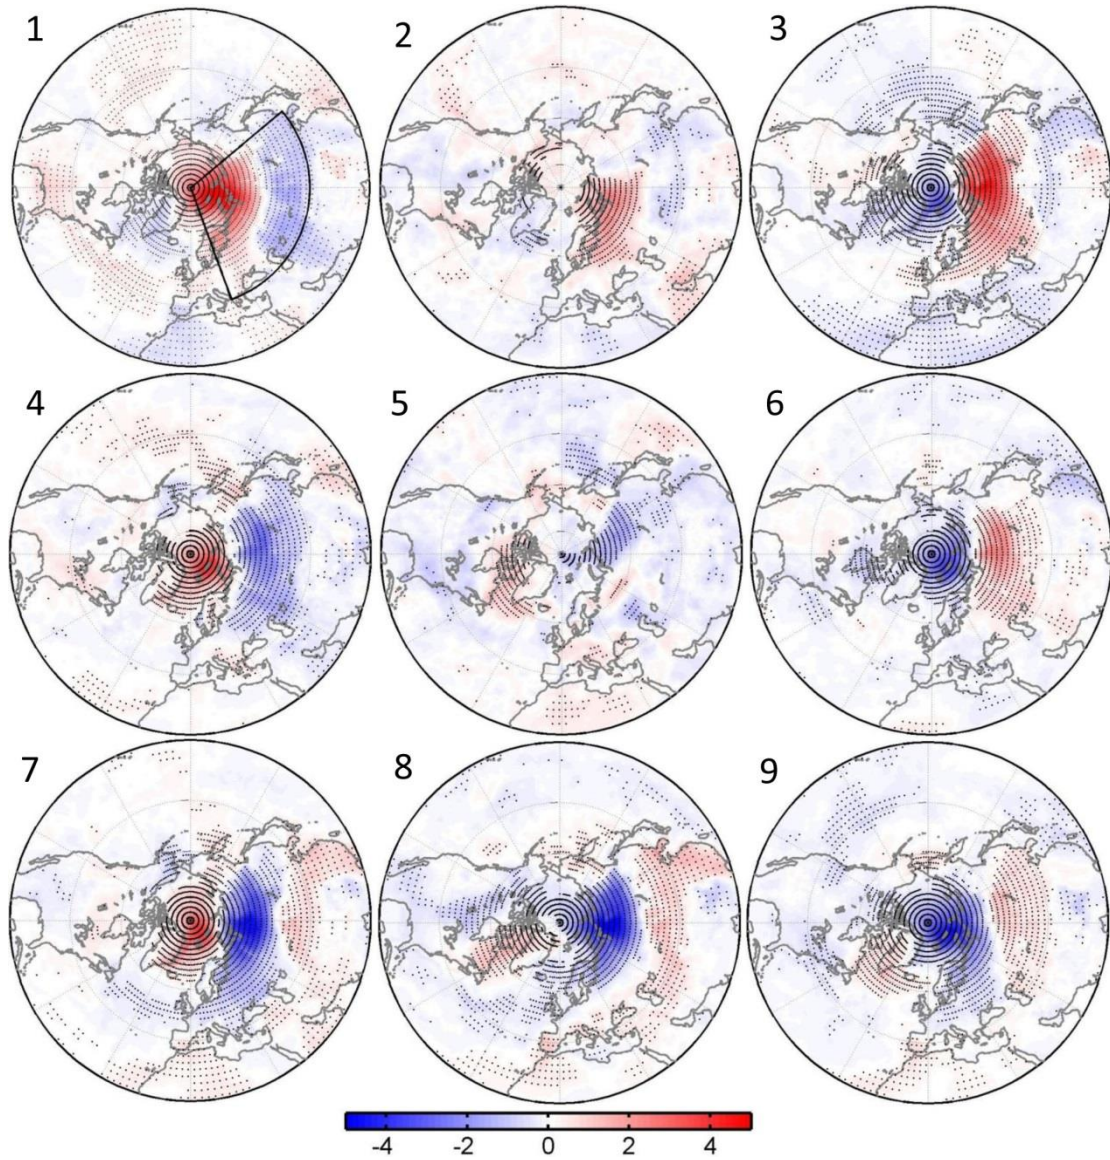

1055  
1056  
1057  
1058  
1059  
1060  
1061  
1062  
1063  
1064  
1065

Figure 4. Corresponding anomalous daily accumulated downward longwave radiation ( $10^5 \text{ W m}^{-2}$ ) without removing its linear trend from ERA-Interim reanalysis over the 1979-2019 period for each node in Figure 1. Dotted regions indicate the above 95% confidence level. The thick black lines denote-show the study region.

1066  
1067  
1068  
1069  
1070  
1071  
1072  
1073  
1074

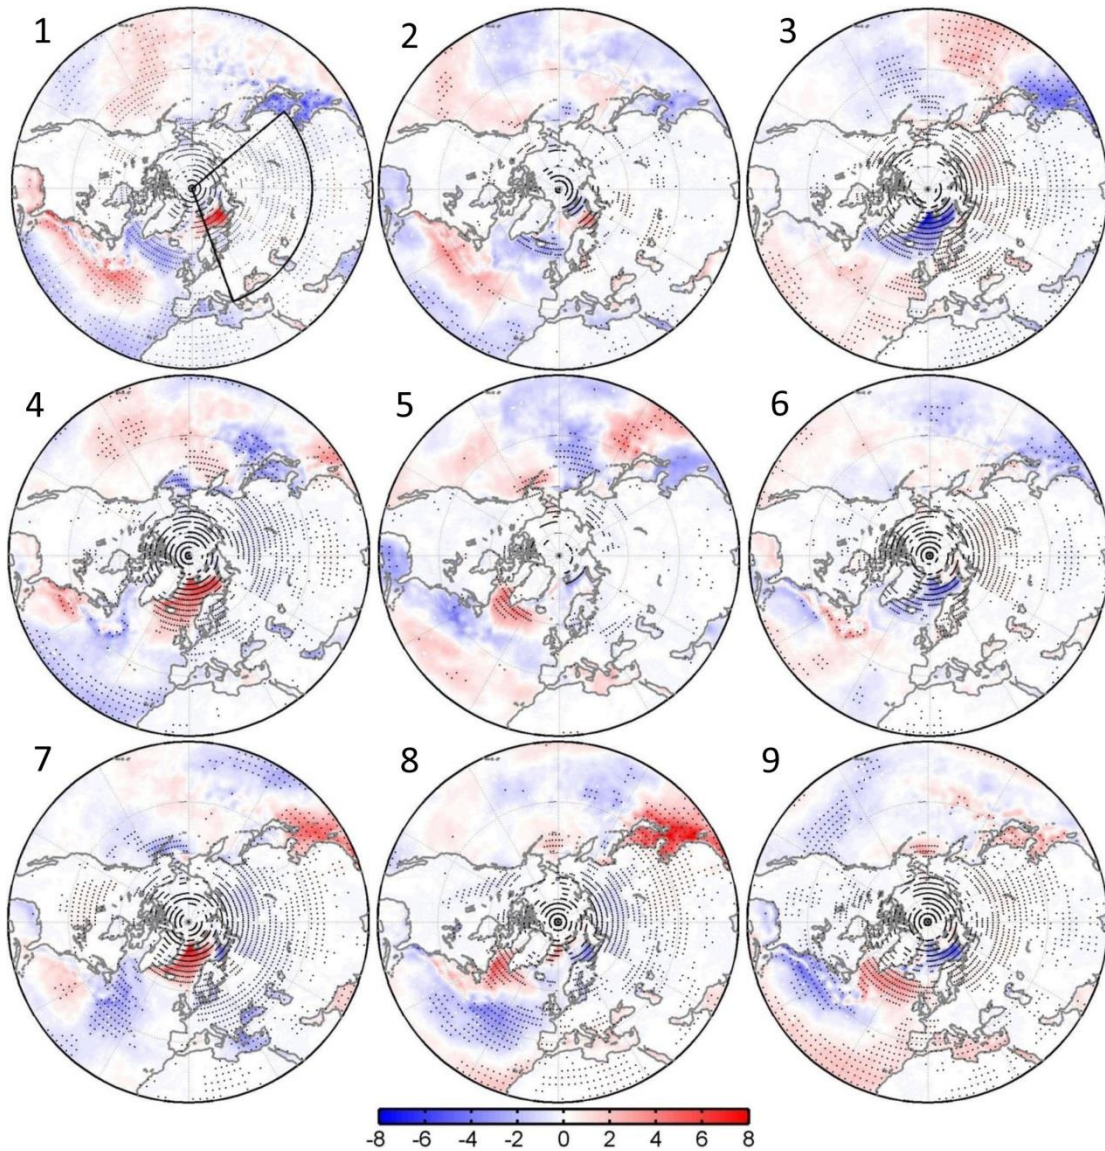

1075  
1076  
1077  
1078  
1079  
1080  
1081  
1082

Figure 5. Corresponding anomalous daily accumulated turbulent heat flux (sensible and latent heat) ( $10^5 \text{ W m}^{-2}$ ) without removing their linear trends from ERA-Interim reanalysis over the 1979-2019 period for each node in Figure 1. Positive values denote heat flux from atmosphere to ocean and vice versa. Dotted regions indicate the above 95% confidence level. The thick black lines denote show the study region.

1083  
1084  
1085  
1086  
1087  
1088  
1089  
1090  
1091  
1092  
1093  
1094

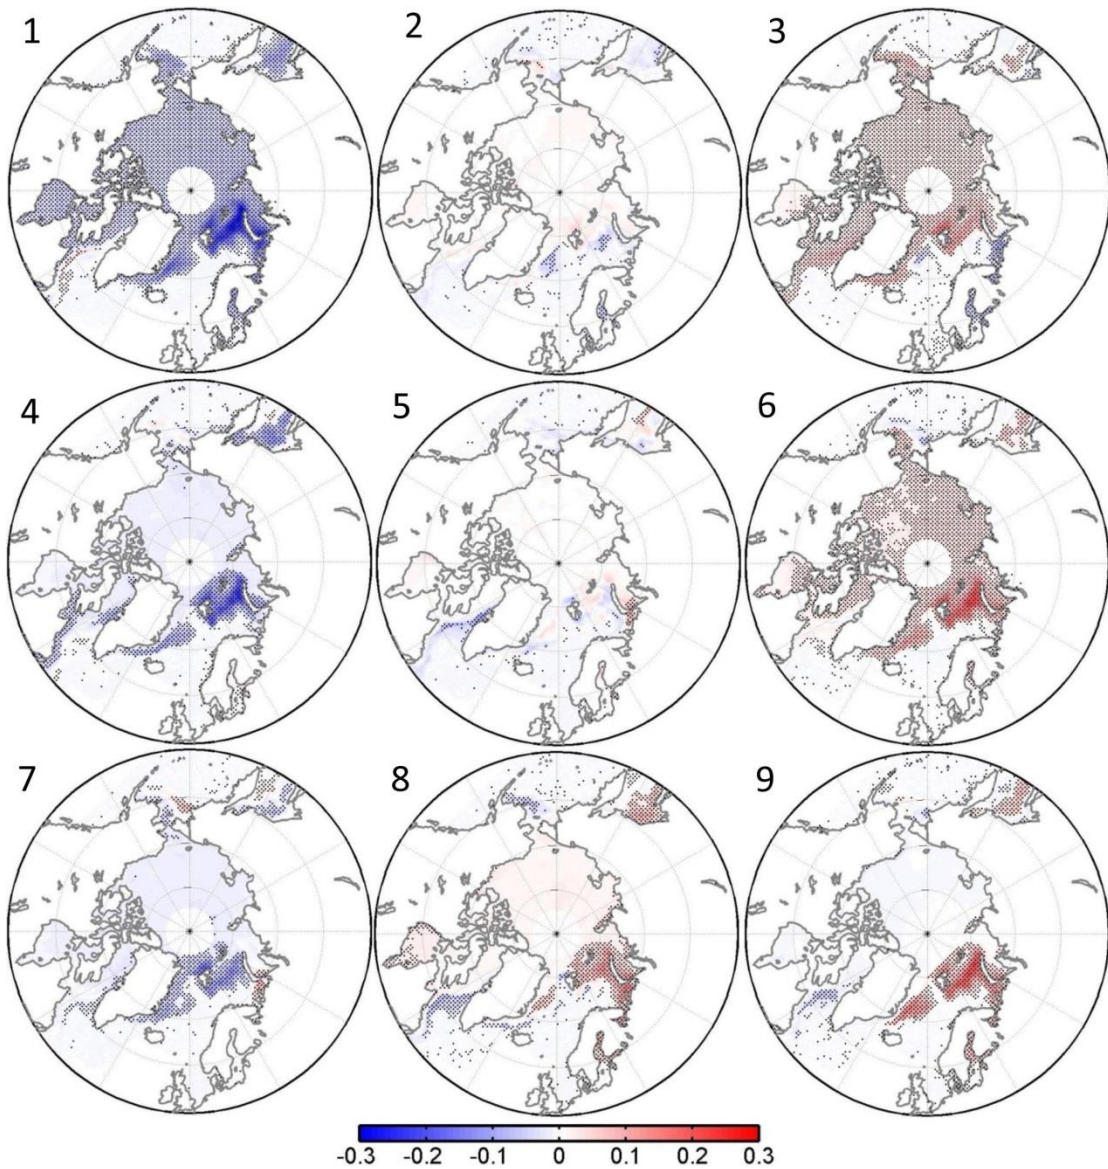

1095  
1096  
1097  
1098  
1099

Figure 6. Corresponding anomalous wintertime sea ice concentration without removing its linear trend from the NSIDC over the 1979-2019 period for each node in Figure 1. Dotted regions indicate the above 95% confidence level.

1100  
1101  
1102  
1103  
1104  
1105  
1106  
1107  
1108  
1109  
1110  
1111  
1112  
1113  
1114

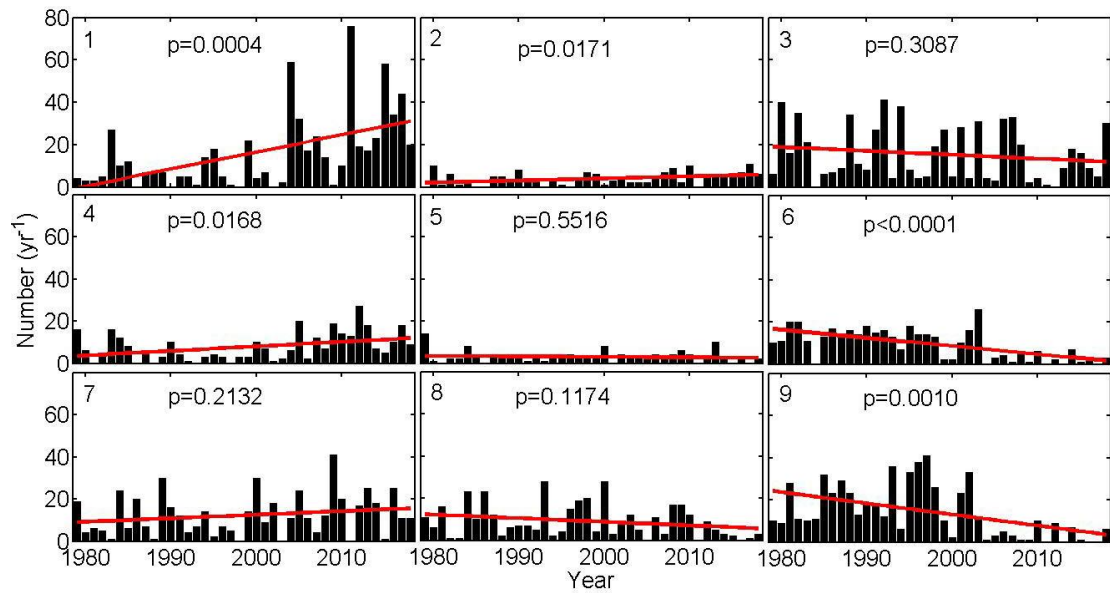

1115  
1116  
1117  
1118  
1119  
1120  
1121  
1122  
1123  
1124  
1125  
1126  
1127  
1128  
1129

Figure 7. Time series of the number of days for occurrence of each SOM node in Figure 1 over the 1979-2019 period. The thick lines denote the trend in time series.

1130  
1131  
1132

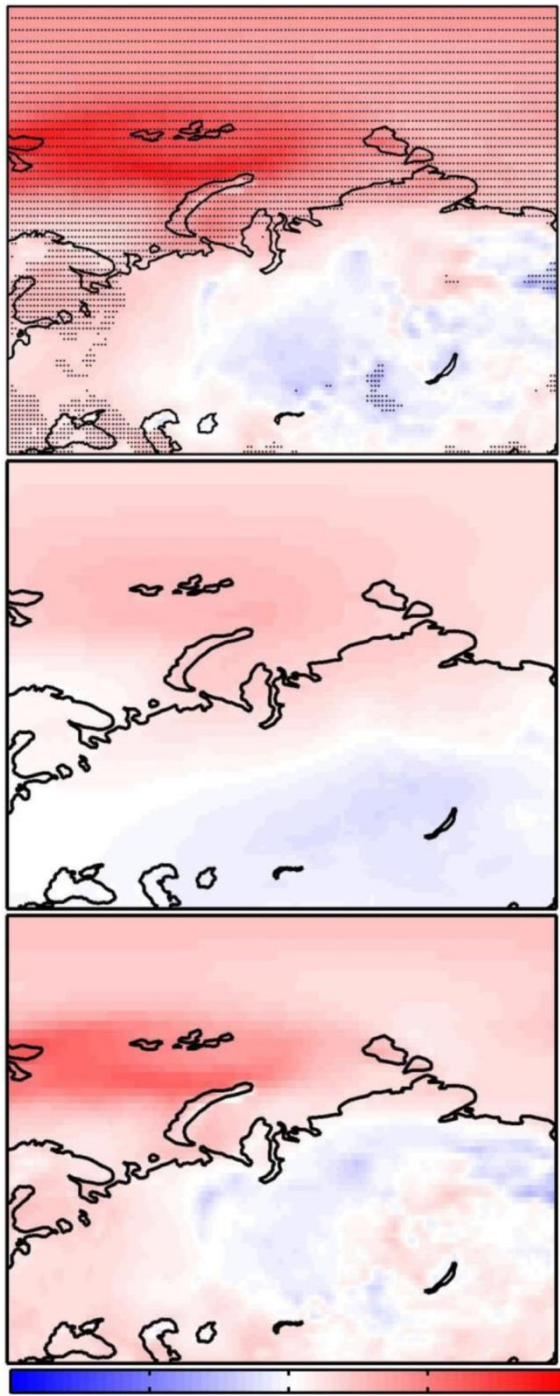

1133 -0.4 -0.2 0 0.2 0.4  
1134 Figure 8. Total (top), SOM-explained (middle), and residual (bottom) trend in wintertime (DJF)  
1135 | surface air temperature ( $^{\circ}\text{C yr}^{-1}$ ) over the 1979-2019 period. Dots in the top panel indicate above  
1136 | 95% confidence level.  
1137



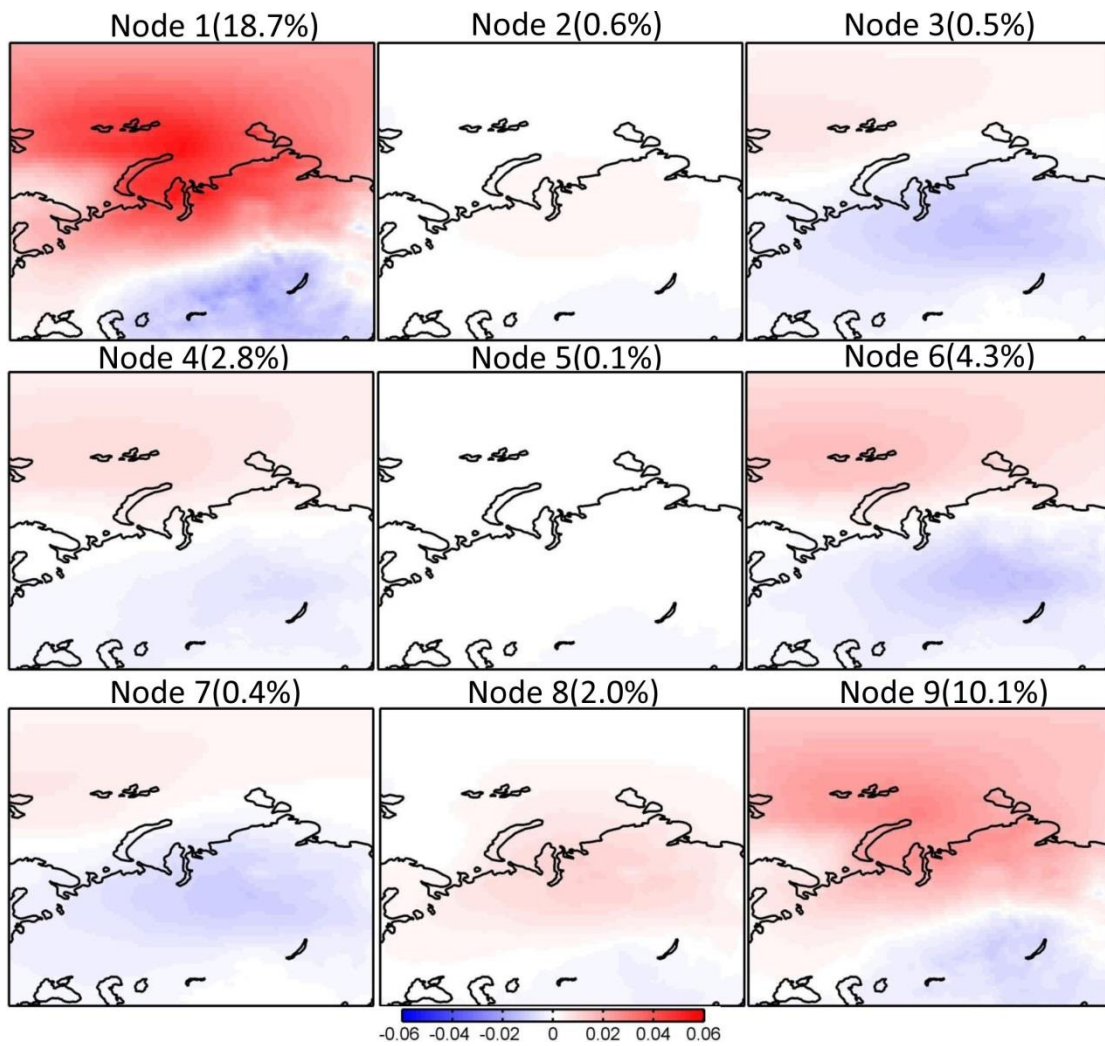

1138  
1139  
1140  
1141  
1142  
1143  
1144  
1145  
1146  
1147  
1148  
1149  
1150  
1151  
1152  
1153  
1154  
1155  
1156  
1157

Figure 9. Trends in surface air temperature explained by each SOM node ( $^{\circ}\text{C yr}^{-1}$ ) over the 1979-2019 period. The percentage in the upper of each panel indicates the fraction of the total trend represented by each node.

1158  
1159

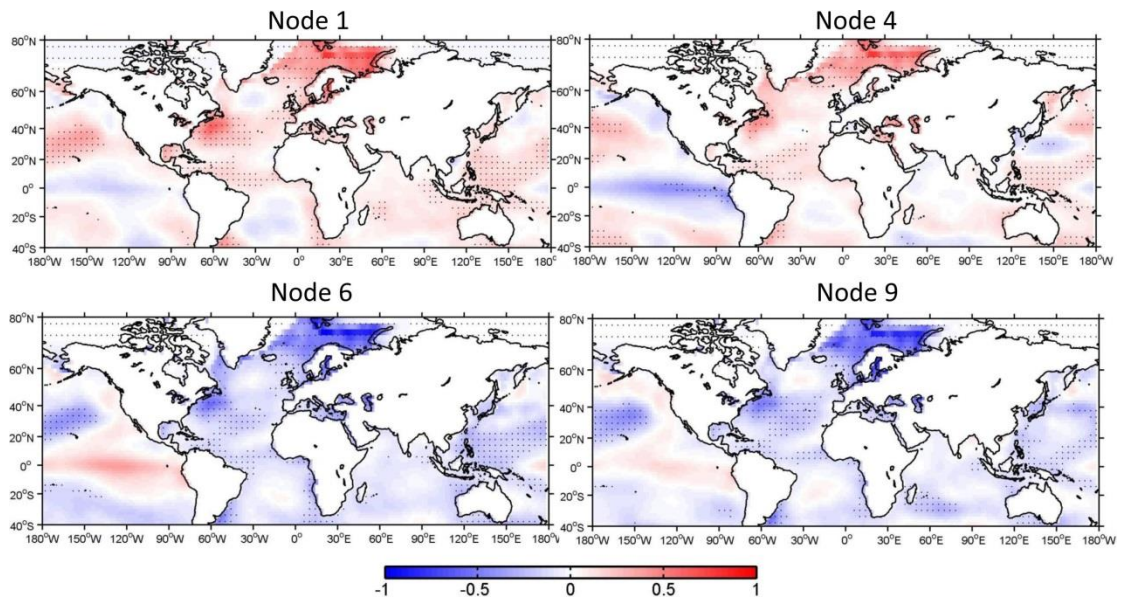

1160

1161 Figure 10. Anomalous SST ( $^{\circ}\text{C}$ ) regressed into the normalized time series of occurrence number  
1162 for nodes 1, 4, 6, and 9 without removing its linear trend from the NOAA over the 1979-2019  
1163 period.

1164

1165

1166

1167

1168

1169

1170

1171

1172

1173

1174

1175

1176

1177

1178

1179

1180

1181

1182

1183

1184

1185

1186

1187

1188  
1189  
1190  
1191

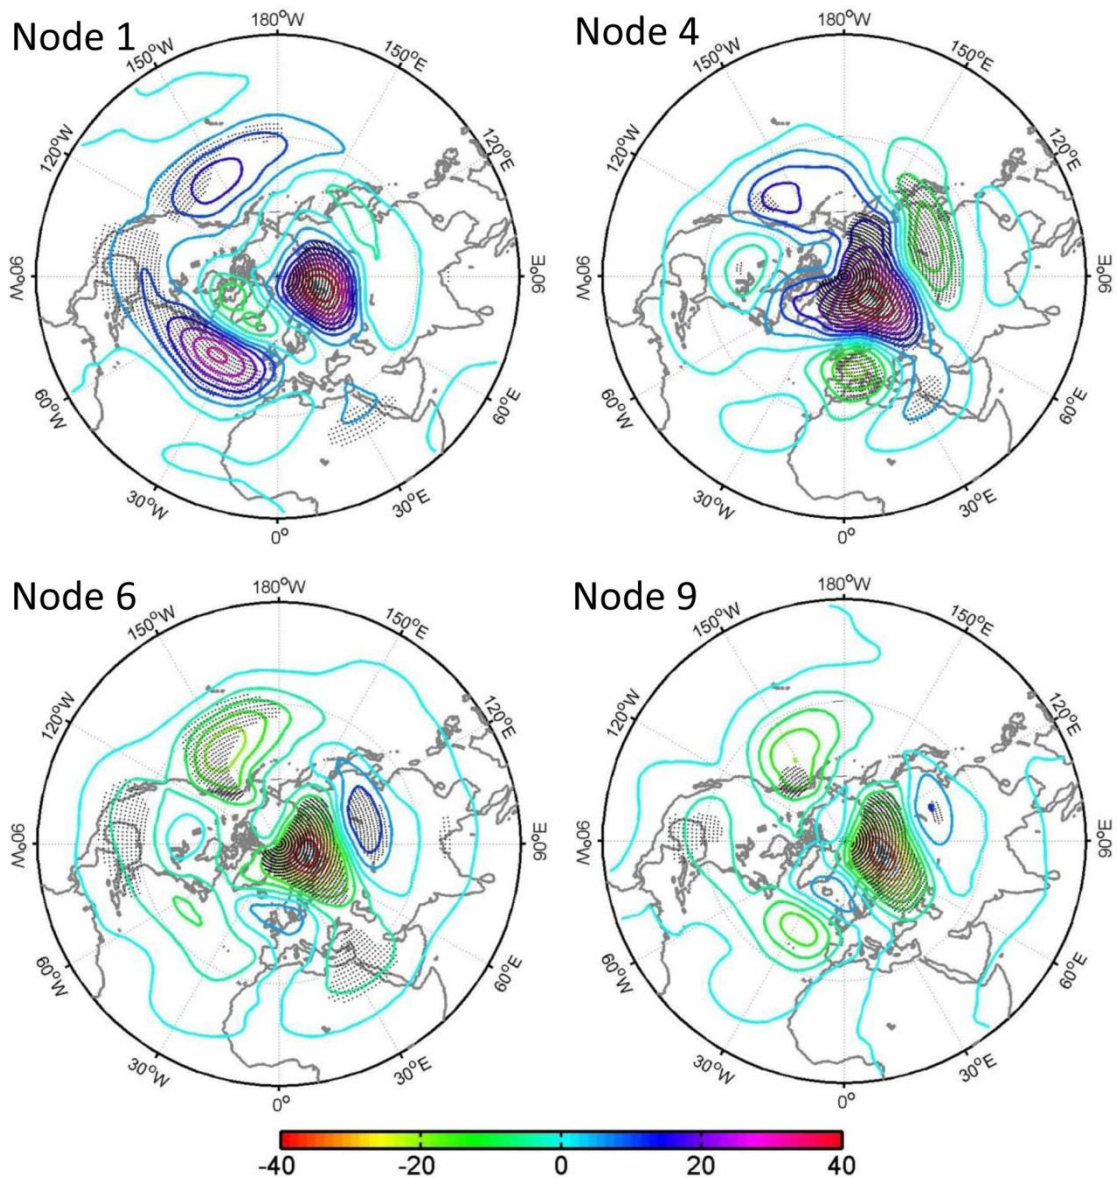

1192  
1193  
1194  
1195  
1196  
1197  
1198  
1199  
1200  
1201  
1202  
1203

Figure 11. Anomalous 500-hPa geopotential height (gpm) regressed into the normalized time series of occurrence number for nodes 1, 4, 6, and 9 without removing its linear trend from ERA-Interim reanalysis over the 1979-2019 period.

1204  
1205  
1206  
1207  
1208

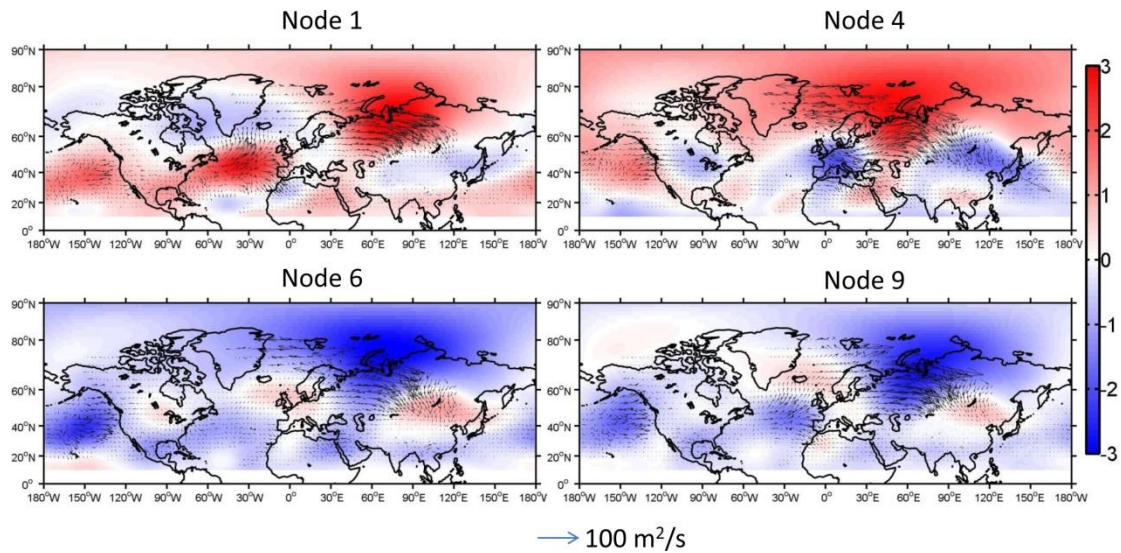

1209  
1210  
1211  
1212  
1213  
1214  
1215  
1216  
1217  
1218  
1219  
1220  
1221  
1222

Figure 12. The anomalous wave activity flux (vectors) (Takaya and Nakamura, 2001) and stream function (colors, units:  $10^7 \text{ m}^2/\text{s}^{-1}$ ) regressed onto the normalized time series of occurrence number for nodes 1, 4, 6, and 9 without removing their linear trends from ERA-Interim reanalysis over the 1979-2019 period.

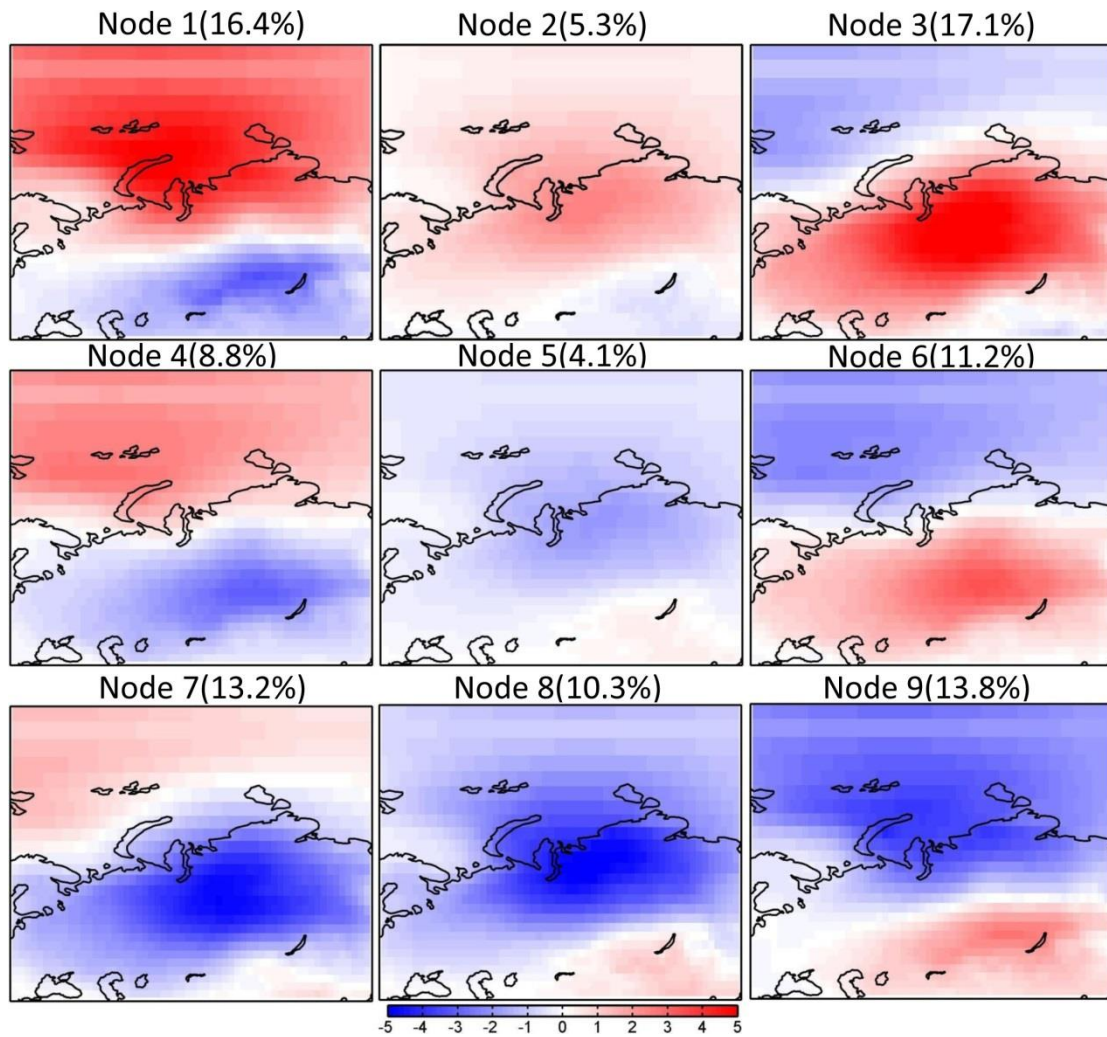

1223  
1224  
1225  
1226  
1227  
1228  
1229  
1230  
1231  
1232  
1233  
1234  
1235  
1236  
1237  
1238  
1239  
1240  
1241  
1242  
1243

Figure 13. Spatial patterns of SOM nodes for detrended daily wintertime (December, January, and February) surface air temperature anomalies (°C) from the 20CR reanalysis for the 1851-2014 period. The number in brackets denotes the frequency of the occurrence for each node.

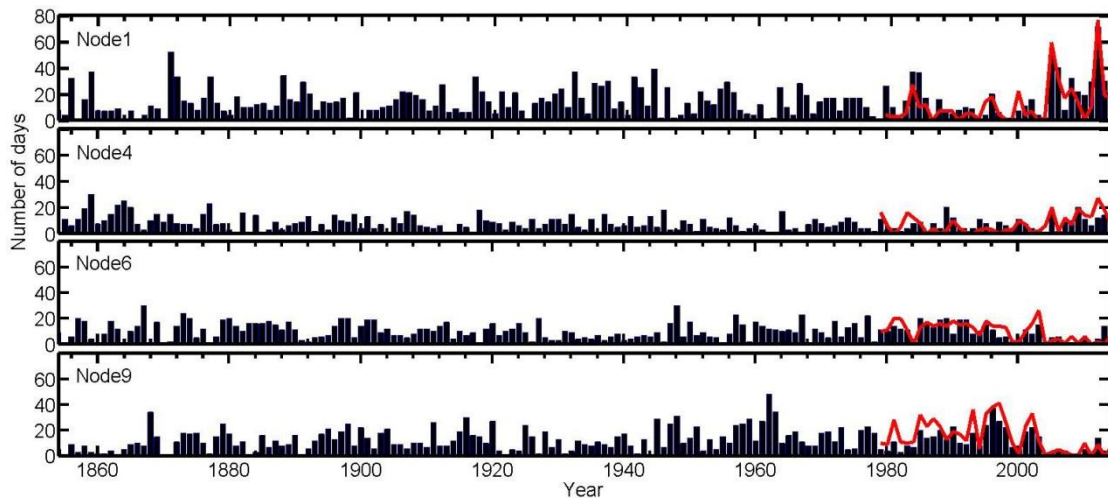

1244  
 1245  
 1246  
 1247  
 1248  
 1249  
 1250  
 1251  
 1252  
 1253  
 1254  
 1255  
 1256  
 1257  
 1258  
 1259  
 1260  
 1261  
 1262  
 1263  
 1264  
 1265  
 1266  
 1267  
 1268  
 1269  
 1270  
 1271  
 1272  
 1273  
 1274  
 1275  
 1276

Figure 14. Time series of the number of days for occurrence of each SOM node in Figure 13 from the 20CR reanalysis for the 1851-2014 period. The thick red lines denote the result in Figure 7 from the ERA-Interim reanalysis for the 1979-2019 period.

1277  
1278

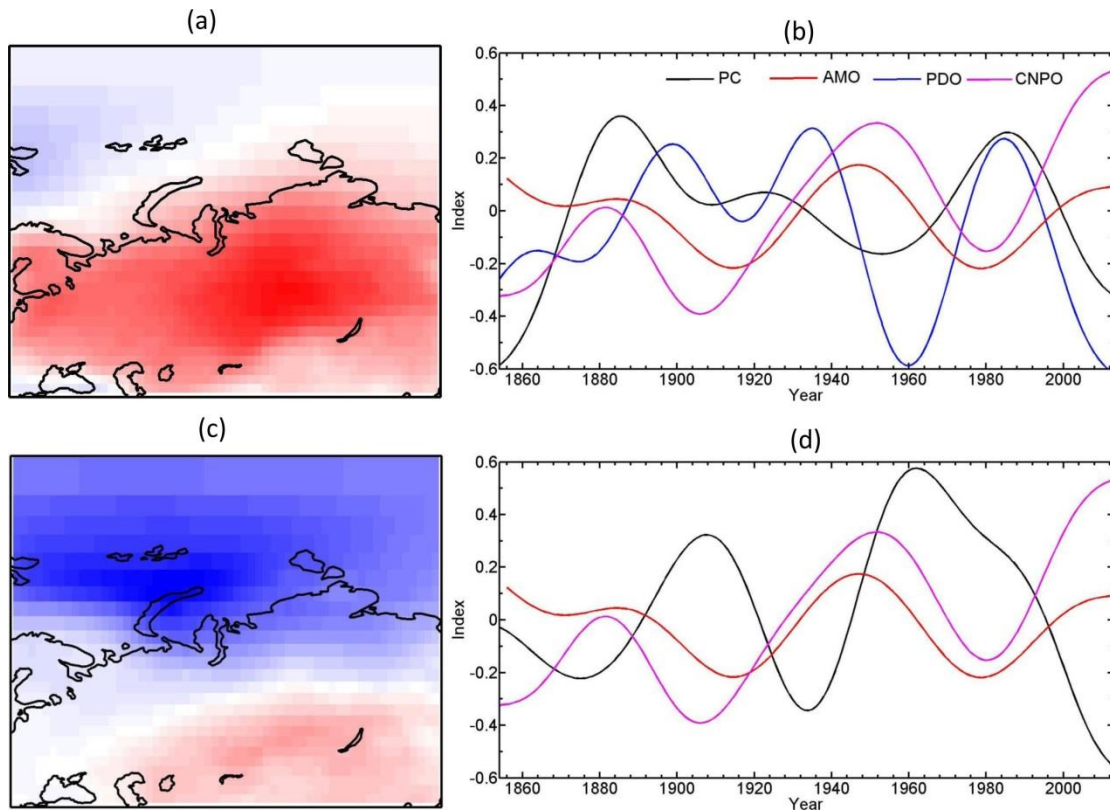

1279

1280 Figure 15. The (a) leading pattern and (b) its time series (PC1 and PC2) of EOF analysis of  
1281 wintertime surface air temperature anomalies [from the 20CR reanalysis for the 1851-2014 period.](#)  
1282 Prior to EOF analysis, surface air temperature data are detrended. A 40-yr low-pass filter is  
1283 applied to the time series of PC1, PC2, AMO, PDO, and central North Pacific Ocean (CNPO)  
1284 indices. The correlation coefficients between PC1 and AMO, PDO and CNPO indices are -0.46  
1285 ( $p < 0.0001$ ), 0.38 ( $p < 0.0001$ ), and -0.19 ( $p = 0.019$ ); those between PC2 and AMO, PDO and  
1286 CNPO indices are -0.44 ( $p < 0.0001$ ), 0.38 ( $p < 0.0001$ ), and -0.26 ( $p = 0.0009$ ).

1287
